# Supplementary material for: Investigating the association between genetically proxied circulating levels of immune checkpoint proteins and cancer survival: protocol for a Mendelian randomisation analysis
Source: PubMed Central journal article supplement (PMC10875531; doi:10.1136/bmjopen-2023-075981), 2024-02-15
Supplement: bmjopen-2023-075981.draft_revisions.pdf [file bmjopen-2023-075981.draft_revisions.pdf]

# BMJ Open

BMJ Open is committed to open peer review. As part of this commitment we make the peer review history of every article we publish publicly available.

When an article is published we post the peer reviewers' comments and the authors' responses online. We also post the versions of the paper that were used during peer review. These are the versions that the peer review comments apply to.

The versions of the paper that follow are the versions that were submitted during the peer review process. They are not the versions of record or the final published versions. They should not be cited or distributed as the published version of this manuscript.

BMJ Open is an open access journal and the full, final, typeset and author-corrected version of record of the manuscript is available on our site with no access controls, subscription charges or pay-per-view fees (<http://bmjopen.bmj.com>).

If you have any questions on BMJ Open's open peer review process please email [info.bmjopen@bmj.com](mailto:info.bmjopen@bmj.com)

# BMJ Open

**Protocol for a Mendelian randomisation analysis  
investigating the association between genetically proxied  
circulating levels of immune checkpoint proteins and cancer  
survival.**

|                               |                                                                                                                                                                                     |
|-------------------------------|-------------------------------------------------------------------------------------------------------------------------------------------------------------------------------------|
| Journal:                      | <i>BMJ Open</i>                                                                                                                                                                     |
| Manuscript ID                 | bmjopen-2023-075981                                                                                                                                                                 |
| Article Type:                 | Protocol                                                                                                                                                                            |
| Date Submitted by the Author: | 24-May-2023                                                                                                                                                                         |
| Complete List of Authors:     | Bate, Tessa; University of Bristol<br>Martin, Richard; University of Bristol, Social Medicine<br>Yarmolinsky, James ; University of Bristol,<br>Haycock, Philip; Bristol University |
| Keywords:                     | ONCOLOGY, Cancer genetics < GENETICS, Prognosis, THERAPEUTICS                                                                                                                       |
|                               |                                                                                                                                                                                     |

SCHOLARONE™  
Manuscripts

1  
2  
3  
4  
5  
6  
7  
8  
9  
10 Protocol for a Mendelian randomisation analysis investigating the association between  
11 genetically proxied circulating levels of immune checkpoint proteins and cancer survival.  
12  
13  
14  
15  
16

17 Tessa Bate<sup>1,2</sup>, Richard M Martin<sup>1-3</sup>, James Yarmolinsky<sup>1,2\*</sup>, Philip C Haycock<sup>1,2\*</sup>  
18

19 <sup>1</sup> Medical Research Council Integrative Epidemiology Unit, University of Bristol  
20

21 <sup>2</sup> Population Health Sciences, Bristol Medical School, University of Bristol  
22

23 <sup>3</sup> NIHR Bristol Biomedical Research Centre, University Hospitals Bristol and Weston NHS  
24 Foundation Trust and the University of Bristol  
25

26 **Corresponding author:**

27 Tessa Bate, MSc

28 MRC Integrative Epidemiology Unit,

29 University of Bristol

30 oi22026@bristol.ac.uk  
31  
32  
33  
34  
35  
36  
37  
38  
39  
40  
41  
42  
43  
44  
45  
46  
47  
48  
49  
50  
51  
52  
53  
54  
55  
56  
57  
58  
59  
60

## ABSTRACT

### Introduction

Compared to the traditional drug development pathway, investigating alternative uses for existing drugs (i.e., drug repurposing) requires substantially less time, cost, and resources. Immune checkpoint inhibitors are licensed for the treatment of certain breast, colorectal, lung and melanoma cancers. These drugs target immune checkpoint proteins to reduce the suppression of T cell activation by cancer cells, enabling normal T cell activation. As T cell suppression is a hallmark of cancer common across sites anatomical sites, we hypothesise that immune checkpoint inhibitors could be repurposed for the treatment of additional cancers to the ones already indicated.

### Methods and analysis

We will use two-sample Mendelian randomisation to investigate the effect of genetically proxied expression of the protein targets of two immune checkpoint inhibitors - programmed cell death protein 1 (PD-1) and programmed death ligand 1 (PD-L1) - on survival of six cancer types (breast, colorectal, lung, melanoma, ovarian, and prostate).

Summary genetic association data will be obtained from prior genome-wide association studies of circulating protein expression and cancer survival in populations of European ancestry. Various sensitivity analyses will be performed to examine the robustness of findings to potential violations of Mendelian randomisation assumptions and the impact of alternative genetic instrument construction strategies. The impact of treatment history and tumour stage on the findings will also be investigated using summary-level and individual-level genetic data where available.

### Ethics and dissemination

No separate ethics approval will be required for these analyses as we will be using data from previously published genome-wide association studies which individually gained ethical approval and participant consent. Results from analyses and statistical code will be made freely available upon the completion of the analysis.

## STRENGTHS AND LIMITATIONS OF THIS STUDY

- As germline genetic variants proxying circulating protein levels are randomly assorted at meiosis and fixed at conception, Mendelian randomisation analyses examining the effect of these proteins on cancer survival should be less prone to conventional issues of confounding and cannot be influenced by reverse causation bias.
- The use of a two-sample Mendelian randomisation framework will permit us to leverage large-scale genetic association data from separate samples, thus enhancing statistical power and precision of estimates.
- The generalisability of our findings to populations of non-European ancestry may be unclear.
- Mendelian randomisation analysis can only evaluate the on-target effects of immune checkpoint inhibitors.

## INTRODUCTION

Drug repurposing is the use of approved drugs for another indication (1, 2). The traditional development and testing pathway of candidate drugs is expensive and time-consuming, with an estimated cost of \$2-3 billion USD and 13 years of research on average required for a chemical compound to be approved for use in clinical practice (3). In contrast, drugs that are tested for a repurposed use should already have demonstrated success in phase I trials for their original indication and thus their safety profiles for human use are known (3-6). Consequently, clinical testing for a repurposed use of a drug can begin at phase II trials, reducing associated time and resource requirements (3-6).

Despite advances in screening and treatment strategies, the number of people diagnosed with, and dying from cancer, continues to increase. Globally, there were estimated to be 19.3 million new cancer diagnoses and 10.0 million cancer deaths in 2020 (7). Six cancer sites (breast, colorectal, lung, melanoma skin, ovarian, and prostate cancer) were estimated to contribute to 44% of the incidence and 41% of mortality from all cancer sites globally in 2020 (7). In addition to the high burden of cancer, there are issues associated with currently available treatments such as development of resistance, severity of side effects, and lack of efficacy in some individuals (8). Identifying new strategies for the treatment of these high-burden cancers using drug repurposing could minimise the cost and patient involvement required for the assessment of their efficacy. Several drugs have been successfully repurposed for cancer treatment, including non-cancer drugs such as thalidomide which was originally developed to treat morning sickness in pregnancy but is now approved to treat multiple myeloma (3, 8, 9).

Shared hallmarks of cancer common to different cancer sites represent an opportunity for drug repurposing using approved drugs which target these mechanisms across multiple sites (3). One such hallmark is the avoidance of immune destruction, which can be suppressed using immune checkpoint inhibitors (3, 10, 11). The first immune checkpoint inhibitor approved by the US Food and Drug Administration (FDA) was the anti-cytotoxic T-lymphocyte associated protein 4 (CTLA-4) monoclonal antibody, ipilimumab, for the treatment of melanoma in 2011 (10). Following the approval of ipilimumab, several other immune checkpoint inhibitors have also been approved for a range of cancer indications.

Two examples of immune checkpoint proteins which have been successfully targeted in cancer treatment are programmed cell death protein 1 (PD-1) and programmed cell death ligand 1 (PD-L1) (10). The interaction between PD-L1 on the surface of cancer cells and PD-1 on the surface of activated T cells suppresses further T cell activation (10, 12-14). The anti-PD-1 monoclonal antibodies cemiplimab (Libtayo), dostarlimab (Jemperli), nivolumab (Opdivo) and pembrolizumab (Keytruda), and the anti-PD-L1 monoclonal antibodies atezolizumab (Tecentriq), avelumab (Bavencio) and durvalumab (Imfinzi) inhibit this interaction and so enable normal T cell activation during anti-cancer immune responses (10, 15). These seven immune checkpoint inhibitors have been approved by the Medicines and Healthcare products Regulatory Agency (MHRA) for specific cancer indications, including some indications for the six cancer types detailed above (Table 1, Supplementary Table 1). Across anti-PD-1 immune checkpoint inhibitors, there are approved indications for the treatment of breast, colorectal, and lung cancers and melanoma, whilst anti-PD-L1 immune checkpoint inhibitors have been approved for breast and lung cancer treatment (16-22) (Table 1, Supplementary Table 1).

Table 1: Medicines and Healthcare products Regulatory Agency (MHRA) indications of anti-programmed cell death protein 1 (PD-1) and anti-programmed cell death ligand 1 (PD-L1) monoclonal antibodies obtained 25<sup>th</sup> March 2023 (A represents immune checkpoint inhibitors with at least one approved indication for the cancer type either as monotherapy or as part of combination therapy).

| Protein target | Immune checkpoint inhibitor | Cancer |            |      |          |         |          |
|----------------|-----------------------------|--------|------------|------|----------|---------|----------|
|                |                             | Breast | Colorectal | Lung | Melanoma | Ovarian | Prostate |
| PD-1           | Cemiplimab (16)             | -      | -          | A    | -        | -       | -        |
|                | Dostarlimab (17)            | -      | -          | -    | -        | -       | -        |
|                | Nivolumab (18)              | -      | A          | A    | A        | -       | -        |
|                | Pembrolizumab (19)          | A      | A          | A    | A        | -       | -        |
| PD-L1          | Atezolizumab (20)           | A      | -          | A    | -        | -       | -        |
|                | Avelumab (21)               | -      | -          | -    | -        | -       | -        |
|                | Durvalumab (22)             | -      | -          | A    | -        | -       | -        |

1  
2  
3 Rather than investigating the efficacy of these specific immune checkpoint inhibitor  
4 compounds, their on-target effects will be proxied using genetic instruments which represent  
5 decreased circulating levels of their protein targets, PD-1 and PD-L1. Consequently, this  
6 study will use Mendelian randomisation (MR) to investigate the association between  
7 genetically proxied PD-1 or PD-L1 expression levels and survival of six cancer types: breast,  
8 colorectal, lung, melanoma, ovarian, and prostate cancer. These six cancer sites have been  
9 chosen for inclusion as they have the most well-powered and accessible genome-wide  
10 association study (GWAS) survival data and make an important contribution to the overall  
11 global cancer burden.  
12  
13

14  
15 The approvals of anti-PD-1 and anti-PD-L1 immune checkpoint inhibitors are not uniform  
16 across cancer sites, even for the drugs targeting the same immune checkpoint protein (Table  
17 1). For example, pembrolizumab is the only anti-PD-1 immune checkpoint inhibitor  
18 approved for a breast cancer indication by the MHRA (19) (Table 1), likely due to lack of  
19 complete late-stage clinical trials with large sample sizes investigating the efficacy of the  
20 other three anti-PD-1 immune checkpoint inhibitors (13, 14). Similarly, although nivolumab  
21 and pembrolizumab both have colorectal cancer indications, there are differences in the  
22 characteristics of the patient populations that they are approved to treat (18, 19) (Table 1,  
23 Supplementary Table 1). Nivolumab is approved to treat mismatch repair deficient (dMMR)  
24 or microsatellite instability high (MSI-H) colorectal cancer patients after chemotherapy as  
25 part of a combination therapy with ipilimumab (18) (Supplementary Table 1). Whereas,  
26 pembrolizumab as monotherapy is approved to treat metastatic or unresectable dMMR/MSI-  
27 H colorectal cancer, the latter following previous treatment (19) (Supplementary Table 1).  
28  
29

30  
31 The approved indications of these immune checkpoint inhibitors are highly specific in many  
32 cases, particularly with respect to molecular tumour markers and treatment history. For  
33 example, durvalumab has been approved by the MHRA for the treatment of adult patients  
34 with locally advanced, unresectable non-small cell lung cancer if at least 1% of their tumour  
35 cells express PD-L1 and their disease did not advance after previous platinum-based  
36 chemoradiotherapy (22) (Supplementary Table 1). Our planned analyses will enable study of  
37 the potential efficacy of these immune checkpoint inhibitors in broader cancer populations  
38 than typically investigated in clinical trials. The populations in the latter tend to be selected  
39 based on prior evidence of anti-proliferative or anti-tumour responses and favourable  
40 pharmacodynamics and pharmacokinetics in pre-clinical studies and early-stage trials (23).  
41 For example, trials investigating the efficacy of anti-PD-L1 immune checkpoint inhibitors for  
42 ovarian cancer treatment have largely restricted to treatment-naïve advanced stage (stage III-  
43 IV) epithelial ovarian cancer patients, but have not been successful (24-28) (Table 1,  
44 Supplementary Table 1).  
45  
46

47  
48 Consequently, this analysis will not only enable evaluation of the efficacy of anti-PD-1 and  
49 anti-PD-L1 immune checkpoint inhibitors for the treatment of cancers where these  
50 medications are not currently approved, but also broader populations of patients with select  
51 cancers where these drugs have previously been approved for specific patient subgroups only  
52 (e.g., populations selected on the basis of treatment history, PD-L1 expression level, or  
53 tumour stage). This may provide evidence to prioritise further studies required for their  
54 approval and could identify repurposing opportunities even for cancers with existing immune  
55 checkpoint inhibitor indications.  
56  
57  
58  
59  
60

### **Mendelian randomisation**

Two-sample MR will be used to investigate the association between circulating PD-1 or PD-L1 protein expression levels and survival for each of the six cancer types separately. This will use measurements of genetic variant-exposure and genetic variant-outcome associations from non-overlapping samples representative of the same underlying population, permitting analyses to leverage large-scale genetic association data for protein measures and cancer survival (29, 30).

MR should be less vulnerable to conventional issues of confounding, as genetic germline variants are randomly assorted at meiosis (5, 29-35). As germline genetic variants are fixed and cannot be influenced by subsequent disease status, MR analyses are immune to reverse causation bias (5, 29-33). Since MR analyses often utilise existing genetic association data, causal relationships can be tested in a more cost-effective and time-efficient manner than in randomised controlled trials (1, 29-31, 33).

### **Objectives**

The aim of this study will be to investigate the association between the on-target effects of anti-PD-1 and anti-PD-L1 immune checkpoint inhibitors and cancer survival using two-sample MR to identify potential drug repurposing opportunities.

## **METHODS AND ANALYSIS**

### **Exposures**

Single-nucleotide polymorphisms (SNPs) associated with circulating PD-1 or PD-L1 expression levels will be used to proxy expression of these proteins. These genetic instruments will be selected from a GWAS of circulating proteins in 54,306 participants of European ancestry in the UK Biobank cohort (36). Statistical analysis, imputation, quality control, and protein expression quantification in this study have been described previously (36).

### **Outcomes**

Genetic association data will be obtained from GWAS of cancer survival in individuals of European ancestry with breast (37), colorectal (38), lung (unpublished), melanoma (39), ovarian (40) and prostate cancer (40). The outcome in each GWAS was defined as cancer-specific mortality, except for the lung cancer GWAS which defined the outcome as all-cause mortality and the ovarian cancer GWAS which examined both progression-free survival and overall survival (all-cause) as outcomes (37-41). Patients for each cancer type who participated in the Genomics England survival GWAS will be combined with the respective cancer survival GWAS to increase statistical power (Table 2).



Table 2: Number of patients and mortality events occurring in the site-specific genome-wide association study (GWAS) (37-41) and Genomics England GWAS for each cancer site. The lung and ovarian cancer mortality events are from all causes, whilst the mortality events for the other cancer sites are cancer site-specific.

| Cancer site | Number of patients      |                  |        | Number of events       |                  |       |
|-------------|-------------------------|------------------|--------|------------------------|------------------|-------|
|             | Site-specific GWAS      | Genomics England | Total  | Site-specific GWAS     | Genomics England | Total |
| Breast      | 91,686<br>(37)          | 2,183            | 93,869 | 7,531<br>(37)          | 238              | 7,769 |
| Colorectal  | 16,964<br>(38)          | 2,190            | 19,154 | 4,010<br>(38)          | 541              | 4,551 |
| Lung        | 10,036<br>(unpublished) | 1,318            | 11,354 | 6,088<br>(unpublished) | 592              | 6,680 |
| Melanoma    | 10,982<br>(39)          | 219              | 11,201 | 1,041<br>(39)          | 108              | 1,149 |
| Ovarian     | 2,901<br>(40)           | 494              | 3,395  | 1,656*                 | 217              | 1,873 |
| Prostate    | 24,023<br>(41)          | -**              | 24,023 | 3,513<br>(41)          | -**              | 3,513 |

\*The number of mortality events in the ovarian cancer GWAS was estimated based on the event rate of 11 OCAC studies (AUS, BAV, BEL, HAW, HSK, MAC, MAL, MAY, NCO, NEC, PVD) (0.571) (42) and the ovarian cancer GWAS sample size (2,901) (40).

\*\*There were fewer than 50 prostate cancer patients included in the Genomics England survival GWAS so these will not be combined with the site-specific prostate cancer GWAS.

### Data harmonisation

Harmonisation of genetic data is the process by which the exposure and outcome GWAS summary statistics are joined together and oriented to reflect the same effect alleles.

Therefore, harmonised data will only include SNPs which were common to both the protein expression and respective cancer survival GWAS.

Harmonisation will be performed using the `harmonise_data` function from the TwoSampleMR R package (<https://mrcieu.github.io/TwoSampleMR/>) (43, 44). This will use the function's default option which infers the positive strand using allele frequencies for palindromic SNPs (<https://mrcieu.github.io/TwoSampleMR/>) (43, 44). The correlation between exposure and outcome GWAS SNP effect allele frequencies will be compared following data harmonisation. If data harmonisation has been successful, the correlation coefficient would be expected to be close to 1, as this would suggest that the same alleles have been chosen as the effect allele in both GWAS summary statistic datasets.

### Mendelian randomisation

#### Assumptions

There are three key assumptions of MR: relevance, exchangeability, and exclusion restriction (32, 35). The relevance assumption states that the genetic instrument must be associated with the exposure of interest, for example in this study the expression level of the drugs' protein target (29, 35). The second MR assumption, exchangeability, requires there are no common causes of the instrument and outcome (29, 35). The final MR assumption, exclusion restriction, states that there must not be any horizontal pleiotropy (29, 31-34, 45). Horizontal

1  
2  
3 pleiotropy occurs when there are additional pathways between the instruments and outcome,  
4 independent of the exposure (29, 35, 45).  
5

#### 6 7 Genetic instrument selection

8 The UK Biobank protein expression GWAS summary statistics (36) will be used to select  
9 SNPs associated with circulating PD-1 or PD-L1 expression. The PD-1 and PD-L1 proteins  
10 are encoded by *PDCDI* (chr2:241849884 - 241858894 in human genome build 38 (hg38))  
11 and *CD274* (chr9:5450503 – 5470566 in hg38), respectively.  
12

13  
14 To minimise vulnerability to horizontal pleiotropy, only SNPs within the coding region for  
15 the gene transcribing the target protein, known as *cis* SNPs, will be included in genetic  
16 instrument sets (45). *Cis* instruments to proxy both proteins will be constructed in PLINK  
17 version 1.9 (46, 47) using SNPs in or within 500 kilobases (kb) from *PDCDI* or *CD274* that  
18 are associated with expression of these proteins ( $P < 5 \times 10^{-6}$ ) at linkage disequilibrium (LD)  
19  $r^2 < 0.30$  (based on clumping with a random sample of 10,000 European participants from the  
20 UK Biobank) (5, 45, 48).  
21

#### 22 23 Estimator

24 Where the genetic instrument consists of one SNP, the Wald ratio will be used to assess the  
25 association between a protein instrumented by this SNP and cancer survival (6, 33, 49).  
26 Where a genetic instrument consists of two or more SNPs, the inverse-variance weighted  
27 (IVW) method will instead be used to investigate the association between a protein  
28 instrumented by these SNPs and cancer survival (6, 33, 49). Any LD between SNPs included  
29 in an instrument will be accounted for in analysis using a SNP correlation matrix based on a  
30 random sample of 10,000 participants of European ancestry from the UK Biobank (35, 48,  
31 50). Heterogeneity of MR results across independent SNPs included in the genetic instrument  
32 sets will be assessed using Cochran's Q tests and MR results will be compared across each  
33 SNP in the instrument by visual inspection (29, 33, 51).  
34  
35

36  
37 The protein expression GWAS included age, sex, age-sex interaction terms, protein  
38 expression measurement batch, UK Biobank centre, genotyping array, the first twenty  
39 principal components (PCs) of genetic ancestry, and duration between blood sample  
40 collection and protein expression measurement as covariates (36). Aside from the breast  
41 cancer GWAS which did not adjust for any covariates, the cancer site-specific GWAS were  
42 all adjusted for genetic PCs (although for different numbers of PCs) (37-41). The colorectal  
43 cancer survival GWAS additionally adjusted for age at diagnosis, sex, genotyping platform  
44 and study where the data originated from (38). The lung cancer survival GWAS also adjusted  
45 for age and sex (unpublished). The melanoma survival GWAS included age and sex as  
46 covariates in addition to genotyping batch for one cohort (39). For the ovarian cancer survival  
47 GWAS, the primary study, residual disease, tumour stage, histology, tumour grade, and age  
48 were also adjusted for (40). For the ovarian cancer survival GWAS, the primary study,  
49 residual disease, tumour stage, histology, tumour grade, and age were also adjusted for (40).  
50 The prostate cancer survival GWAS additionally included age, diagnostic prostate specific  
51 antigen (PSA) level and Gleason score as covariates (41).  
52  
53  
54

#### 55 56 Power

57 Using the UK Biobank protein expression GWAS (36), the lead *cis* SNP for *PDCDI*  
58 (rs1011514130) explained approximately 2.97% of the variation in circulating PD-1  
59 expression whilst the lead *cis* SNP for *CD274* (rs822340) explained approximately 4.83% of  
60 the variation in PD-L1 expression.

Across all six cancer types, there is an estimated power of 80% to detect hazard ratios of at least  $\geq 1.61$  or  $\leq 0.62$  per unit decrease in normalised protein expression levels (alpha set to 5%) (Table 3).

Table 3: Estimated number of participants (N), mortality event rate, median survival, and hazard ratio (HR) per standard deviation decrease detectable with 80% power for each cancer site.

| Cancer     | N      | Event rate | Median survival (months) | HRs detectable at estimated 80% power |                                  |
|------------|--------|------------|--------------------------|---------------------------------------|----------------------------------|
|            |        |            |                          | PD-1                                  | PD-L1                            |
| Breast     | 93,869 | 0.083      | 64.8 (52)                | HR $\geq 1.20$<br>HR $\leq 0.83$      | HR $\geq 1.17$<br>HR $\leq 0.86$ |
| Colorectal | 19,154 | 0.238      | 38.4 (52)                | HR $\geq 1.27$<br>HR $\leq 0.78$      | HR $\geq 1.22$<br>HR $\leq 0.82$ |
| Lung       | 11,354 | 0.588*     | 3.6 (52)                 | HR $\geq 1.22$<br>HR $\leq 0.82$      | HR $\geq 1.18$<br>HR $\leq 0.85$ |
| Melanoma   | 11,201 | 0.103      | 53.4 (53)                | HR $\geq 1.61$<br>HR $\leq 0.62$      | HR $\geq 1.50$<br>HR $\leq 0.67$ |
| Ovarian    | 3,395  | 0.552*     | 30.1 (54)                | HR $\geq 1.46$<br>HR $\leq 0.68$      | HR $\geq 1.37$<br>HR $\leq 0.73$ |
| Prostate   | 24,023 | 0.146      | 62.4 (52)                | HR $\geq 1.32$<br>HR $\leq 0.76$      | HR $\geq 1.26$<br>HR $\leq 0.80$ |

\*All-cause mortality event rate.

Hazard ratios (HR) per standard deviation decrease estimated to be detected at 80% power calculated with the *survSNP R* package (55) using the combined estimated sample size and event rate from each cancer survival GWAS and the respective Genomics England cancer survival GWAS, median survival, and assuming a false positive rate of 0.05.

### Sensitivity analyses

The main analyses will be repeated using genetic instruments constructed with more stringent thresholds: significance P-value thresholds of  $5 \times 10^{-7}$  and  $5 \times 10^{-8}$ , window sizes of 250 kb and 100 kb on either side of the gene of interest, and LD  $r^2$  thresholds of 0.2, 0.1, and 0.001. Although the primary analysis will only consider *cis* variants, *cis* and *trans* variants (> 500 kb from the gene of interest) will also be considered in secondary analyses. Instruments constructed from *cis* and *trans* variants will be selected based on P-value and LD threshold ( $P < 5 \times 10^{-8}$ ,  $r^2 < 0.001$ ) with reference to a random sample of 10,000 participants from the UK Biobank. Where instruments are constructed from two or more SNPs, the primary analysis will also be re-run iteratively excluding individual SNPs from instruments to investigate whether findings are driven by individual SNPs (35).

Colocalisation analysis will be performed using PWCoCo (<https://github.com/jwr-git/pwcoco>) to investigate whether any significant MR results are confounded due to LD between one variant causing a change in protein expression and another causing a change in cancer survival through an independent pathway (4, 49, 56, 57).

Pleiotropy will be investigated by conducting phenome-wide association studies (PheWAS) to investigate whether the genetic instruments proxying PD-1 or PD-L1 expression are also associated with other phenotypes. This will be achieved using MR Base (<https://github.com/MRCIEU/TwoSampleMR>) (43, 44). The significance thresholds will be Bonferroni-corrected for the number of traits looked up (30, 49). Although these methods will

not specifically investigate horizontal pleiotropy, they will assess the possible extent of either vertical pleiotropy or horizontal pleiotropy. Vertical pleiotropy occurs when there is a mediator in the pathway between the exposure and outcome and, in contrast to horizontal pleiotropy, does not violate MR assumptions (31, 35, 45, 56).

Index event bias (also known as collider bias) may occur in studies of cancer survival if the hypothesised causal factor being evaluated (in this case, PD-1 or PD-L1) is a risk factor for disease onset (4, 30, 58). If SNPs found to be significantly associated with cancer survival are also associated with risk of the same cancer type, methods including the SlopeHunter R package (<https://github.com/Osmahmoud/SlopeHunter>) will be used to evaluate and account for index event bias (59, 60).

### Secondary analyses

Where feasible, sub-group analyses will be performed to explore the impact of treatment history and tumour stage on the findings. We expect hazard ratios to be larger in earlier tumour stages and in treatment-naïve patients, compared to late-stage diagnoses and heavily treated patients, respectively.

### Software

The TwoSampleMR R package (<https://mrcieu.github.io/TwoSampleMR/>) (43, 44) will be used to perform two-sample MR using summary-level data.

### Patient and public involvement

Members of an existing group of cancer patients and caregivers volunteered to discuss this research project after a proposal had been drafted. The importance of potential side effects of medications and generalisability of findings to populations of non-European ancestry were highlighted. The concerns related to side effects will not be addressed here as they are outside of the scope of this analysis but will be considered as limitations and could be studied in the future using alternate data sources such as electronic medical record data. The analyses may be able to be performed for non-European populations if genetic survival data from cancer patients of non-European ancestry are available. Patients and the public were not involved in the design of this study.

## ETHICS AND DISSEMINATION

The protein expression GWAS conducted by Sun et al. (2022) utilised UK Biobank data obtained under the approved application numbers 65851, 20361, 26041, 44257, 53639, 69804 (36).

The breast cancer survival GWAS conducted by Morra et al. (2021) followed the Declaration of Helsinki principles (37). The colorectal cancer survival GWAS conducted by Labadie et al. (2022) gained approval by the Fred Hutchinson Cancer Research Center Institutional Review Board (38). The lung cancer survival GWAS ethical approval information is unpublished. The melanoma survival GWAS conducted by Seviiri et al. (2022) gained approval by the Sydney Local Health District Ethics Review Committee (MIA cohort), the United Kingdom's National North West Multi-Centre Research Ethics Committee (UK Biobank cohort) and the Human Research Ethics Committee of QIMR Berghofer Medical Research Institute (protocol) (39). The ovarian cancer survival GWAS conducted by Johnatty et al. (2015) and the prostate cancer survival GWAS conducted by Szulkin et al. (2015) included primary

1  
2  
3 GWAS which individually gained ethical approval from human research ethics committees  
4 (40, 41).(37). The colorectal cancer survival GWAS conducted by Labadie et al. (2022)  
5 gained approval by the Fred Hutchinson Cancer Research Center Institutional Review Board  
6 (38). The lung cancer survival GWAS ethical approval information is unpublished. The  
7 melanoma survival GWAS conducted by Seviiri et al. (2022) gained approval by the Sydney  
8 Local Health District Ethics Review Committee (MIA cohort), the United Kingdom's  
9 National North West Multi-Centre Research Ethics Committee (UK Biobank cohort) and the  
10 Human Research Ethics Committee of QIMR Berghofer Medical Research Institute  
11 (protocol) (39). The ovarian cancer survival GWAS conducted by Johnatty et al. (2015) and  
12 the prostate cancer survival GWAS conducted by Szulkin et al. (2015) included primary  
13 GWAS which individually gained ethical approval from human research ethics committees  
14 (40, 41).  
15  
16  
17

18 All participants involved in the protein expression GWAS and breast, colorectal, melanoma,  
19 ovarian (OCAC), and prostate cancer survival GWAS provided informed consent (36-41, 61).  
20  
21

22 The results of these analyses will be published and disseminated to members of the  
23 University of Bristol MRC Integrative Epidemiology Unit ICEP User Reference Group which  
24 is comprised of cancer patients and caregivers. Any statistical code will be made publicly  
25 available.  
26  
27

## 28 REFERENCES

- 29 1. Walker VM, Davey Smith G, Davies NM, Martin RM. Mendelian randomization: a  
30 novel approach for the prediction of adverse drug events and drug repurposing opportunities.  
31 *Int J Epidemiol.* 2017;46(6):2078-89.
- 32 2. Tran AA, Prasad V. Drug repurposing for cancer treatments: a well-intentioned, but  
33 misguided strategy. *The Lancet Oncology.* 2020;21(9):1134-6.
- 34 3. Zhang Z, Zhou L, Xie N, Nice EC, Zhang T, Cui Y, et al. Overcoming cancer  
35 therapeutic bottleneck by drug repurposing. *Signal Transduct Target Ther.* 2020;5(1):113.
- 36 4. Joharatnam-Hogan N, Alexandre L, Yarmolinsky J, Lake B, Capps N, Martin RM, et  
37 al. Statins as Potential Chemoprevention or Therapeutic Agents in Cancer: a Model for  
38 Evaluating Repurposed Drugs. *Curr Oncol Rep.* 2021;23(3):29.
- 39 5. Walker VM, Kehoe PG, Martin RM, Davies NM. Repurposing antihypertensive drugs  
40 for the prevention of Alzheimer's disease: a Mendelian randomization study. *International*  
41 *Journal of Epidemiology.* 2019;49(4):1132-40.
- 42 6. Liu J, Cheng Y, Li M, Zhang Z, Li T, Luo X-J. Genome-wide Mendelian  
43 randomization identifies actionable novel drug targets for psychiatric disorders.  
44 *Neuropsychopharmacology.* 2023;48(2):270-80.
- 45 7. Sung H, Ferlay J, Siegel RL, Laversanne M, Soerjomataram I, Jemal A, et al. Global  
46 Cancer Statistics 2020: GLOBOCAN Estimates of Incidence and Mortality Worldwide for 36  
47 Cancers in 185 Countries. *CA: A Cancer Journal for Clinicians.* 2021;71(3):209-49.
- 48 8. Hanusova V, Skalova L, Kralova V, Matouskova P. Potential anti-cancer drugs  
49 commonly used for other indications. *Curr Cancer Drug Targets.* 2015;15(1):35-52.
- 50 9. Yang EJ, Wu C, Liu Y, Lv J, Sup Shim J. Revisiting Non-Cancer Drugs for Cancer  
51 Therapy. *Curr Top Med Chem.* 2016;16(19):2144-55.
- 52 10. Marin-Acevedo JA, Kimbrough EO, Lou Y. Next generation of immune checkpoint  
53 inhibitors and beyond. *Journal of Hematology & Oncology.* 2021;14(1):45.  
54  
55  
56  
57  
58  
59  
60

11. Hanahan D. Hallmarks of Cancer: New Dimensions. *Cancer Discovery*. 2022;12(1):31-46.
12. Jeong T-J, Lee H-T, Gu N, Jang Y-J, Choi S-B, Park U-B, et al. The High-Resolution Structure Reveals Remarkable Similarity in PD-1 Binding of Cemiplimab and Dostarlimab, the FDA-Approved Antibodies for Cancer Immunotherapy. *Biomedicines*. 2022;10(12):3154.
13. Singh V, Sheikh A, Abourehab MAS, Kesharwani P. Dostarlimab as a Miracle Drug: Rising Hope against Cancer Treatment. *Biosensors (Basel)*. 2022;12(8).
14. Wesolowski J, Tankiewicz-Kwedlo A, Pawlak D. Modern Immunotherapy in the Treatment of Triple-Negative Breast Cancer. *Cancers (Basel)*. 2022;14(16).
15. Fessas P, Lee H, Ikemizu S, Janowitz T. A molecular and preclinical comparison of the PD-1-targeted T-cell checkpoint inhibitors nivolumab and pembrolizumab. *Semin Oncol*. 2017;44(2):136-40.
16. Medicines and Healthcare products Regulatory Agency. LIBTAYO: SUMMARY OF PRODUCT CHARACTERISTICS 2022 [Available from: <https://mhraproducts4853.blob.core.windows.net/docs/1f0f40fa2f9461bd438b181736a620032651f70a>].
17. Medicines and Healthcare products Regulatory Agency. JEMPERLI: SUMMARY OF PRODUCT CHARACTERISTICS 2022 [Available from: <https://mhraproducts4853.blob.core.windows.net/docs/17d1049c69f319d0b5d3b392264f1473da412992>].
18. Medicines and Healthcare products Regulatory Agency. OPDIVO: SUMMARY OF PRODUCT CHARACTERISTICS 2022 [Available from: <https://mhraproducts4853.blob.core.windows.net/docs/8355d7f28eb4601b4f0cfd41f6b423cc0ecbb7ac>].
19. Medicines and Healthcare products Regulatory Agency. KEYTRUDA: SUMMARY OF PRODUCT CHARACTERISTICS 2022 [Available from: <https://mhraproducts4853.blob.core.windows.net/docs/9a01eb070d0f4b699fc009e2a0932ae62586477f>].
20. Medicines and Healthcare products Regulatory Agency. Tecentriq: SUMMARY OF PRODUCT CHARACTERISTICS 2022 [Available from: <https://mhraproducts4853.blob.core.windows.net/docs/9ee66a803927d06cf73407425f3c46aa9172e3d9>].
21. Medicines and Healthcare products Regulatory Agency. Bavencio: SUMMARY OF PRODUCT CHARACTERISTICS 2023 [Available from: <https://mhraproducts4853.blob.core.windows.net/docs/67a96f2b38c91da858ddea961907c4c8315b36ec>].
22. Medicines and Healthcare products Regulatory Agency. IMFINZI: SUMMARY OF PRODUCT CHARACTERISTICS 2023 [Available from: <https://mhraproducts4853.blob.core.windows.net/docs/c631685fa069c1e6b3c414043180b30082374d65>].
23. Wong CC, Cheng KW, Rigas B. Preclinical predictors of anticancer drug efficacy: critical assessment with emphasis on whether nanomolar potency should be required of candidate agents. *J Pharmacol Exp Ther*. 2012;341(3):572-8.
24. Morand S, Devanaboyina M, Staats H, Stanbery L, Nemunaitis J. Ovarian Cancer Immunotherapy and Personalized Medicine. *Int J Mol Sci*. 2021;22(12).
25. Shoji T, Sato C, Tomabechei H, Takatori E, Kaido Y, Nagasawa T, et al. Expectations and Challenges of First-Line Maintenance Therapy for Advanced Ovarian Cancer. *Medicina (Kaunas)*. 2021;57(5).
26. Ledermann JA, Colombo N, Oza AM, Fujiwara K, Birrer MJ, Randall LM, et al. Avelumab in combination with and/or following chemotherapy vs chemotherapy alone in

- 1  
2  
3 patients with previously untreated epithelial ovarian cancer: Results from the phase 3 javelin  
4 ovarian 100 trial. *Gynecologic Oncology*. 2020;159:13-4.
- 5 27. Moore KN, Bookman M, Sehouli J, Miller A, Anderson C, Scambia G, et al.  
6 Atezolizumab, Bevacizumab, and Chemotherapy for Newly Diagnosed Stage III or IV  
7 Ovarian Cancer: Placebo-Controlled Randomized Phase III Trial (IMagyn050/GOG  
8 3015/ENGOT-OV39). *Journal of Clinical Oncology*. 2021;39(17):1842-55.
- 9 28. Harter P, Bidziński M, Colombo N, Floquet A, Pérez MJR, Kim J-W, et al. DUO-O: A  
10 randomized phase III trial of durvalumab (durva) in combination with chemotherapy and  
11 bevacizumab (bev), followed by maintenance durva, bev and olaparib (olap), in newly  
12 diagnosed advanced ovarian cancer patients. *Journal of Clinical Oncology*.  
13 2019;37(15\_suppl):TPS5598-TPS.
- 14 29. Zheng J, Baird D, Borges MC, Bowden J, Hemani G, Haycock P, et al. Recent  
15 Developments in Mendelian Randomization Studies. *Curr Epidemiol Rep*. 2017;4(4):330-45.
- 16 30. Mokry LE, Zhou S, Guo C, Scott RA, Devey L, Langenberg C, et al. Interleukin-18 as  
17 a drug repositioning opportunity for inflammatory bowel disease: A Mendelian randomization  
18 study. *Scientific Reports*. 2019;9(1):9386.
- 19 31. Gill D, Georgakis MK, Walker VM, Schmidt AF, Gkatzionis A, Freitag DF, et al.  
20 Mendelian randomization for studying the effects of perturbing drug targets. *Wellcome Open*  
21 *Res*. 2021;6:16.
- 22 32. Khasawneh LQ, Al-Mahayri ZN, Ali BR. Mendelian randomization in  
23 pharmacogenomics: The unforeseen potentials. *Biomedicine & Pharmacotherapy*.  
24 2022;150:112952.
- 25 33. Tang B, Wang Y, Jiang X, Thambisetty M, Ferrucci L, Johnell K, et al. Genetic  
26 Variation in Targets of Antidiabetic Drugs and Alzheimer Disease Risk. A Mendelian  
27 Randomization Study. 2022;99(7):e650-e9.
- 28 34. Acosta JN, Szejko N, Falcone GJ. Mendelian Randomization in Stroke: A Powerful  
29 Approach to Causal Inference and Drug Target Validation. *Frontiers in Genetics*. 2021;12.
- 30 35. Yarmolinsky J, Díez-Obrero V, Richardson TG, Pigeyre M, Sjaarda J, Paré G, et al.  
31 Genetically proxied therapeutic inhibition of antihypertensive drug targets and risk of  
32 common cancers: A mendelian randomization analysis. *PLOS Medicine*.  
33 2022;19(2):e1003897.
- 34 36. Sun BB, Chiou J, Traylor M, Benner C, Hsu Y-H, Richardson TG, et al. Genetic  
35 regulation of the human plasma proteome in 54,306 UK Biobank participants. *bioRxiv*.  
36 2022:2022.06.17.496443.
- 37 37. Morra A, Escala-Garcia M, Beesley J, Keeman R, Canisius S, Ahearn TU, et al.  
38 Association of germline genetic variants with breast cancer-specific survival in patient  
39 subgroups defined by clinic-pathological variables related to tumor biology and type of  
40 systemic treatment. *Breast Cancer Research*. 2021;23(1):86.
- 41 38. Labadie JD, Savas S, Harrison TA, Banbury B, Huang Y, Buchanan DD, et al.  
42 Genome-wide association study identifies tumor anatomical site-specific risk variants for  
43 colorectal cancer survival. *Scientific Reports*. 2022;12(1):127.
- 44 39. Seviiri M, Scolyer RA, Bishop DT, Newton-Bishop JA, Iles MM, Lo SN, et al.  
45 Higher polygenic risk for melanoma is associated with improved survival in a high ultraviolet  
46 radiation setting. *Journal of Translational Medicine*. 2022;20(1):403.
- 47 40. Johnatty SE, Tyrer JP, Kar S, Beesley J, Lu Y, Gao B, et al. Genome-wide Analysis  
48 Identifies Novel Loci Associated with Ovarian Cancer Outcomes: Findings from the Ovarian  
49 Cancer Association Consortium. *Clin Cancer Res*. 2015;21(23):5264-76.
- 50 41. Szulkin R, Karlsson R, Whittington T, Aly M, Gronberg H, Eeles RA, et al. Genome-  
51 wide association study of prostate cancer-specific survival. *Cancer Epidemiol Biomarkers*  
52 *Prev*. 2015;24(11):1796-800.
- 53  
54  
55  
56  
57  
58  
59  
60

- 1  
2  
3 42. Nagle CM, Dixon SC, Jensen A, Kjaer SK, Modugno F, deFazio A, et al. Obesity and  
4 survival among women with ovarian cancer: results from the Ovarian Cancer Association  
5 Consortium. *Br J Cancer*. 2015;113(5):817-26.  
6  
7 43. Hemani G, Zheng J, Elsworth B, Wade KH, Haberland V, Baird D, et al. The MR-  
8 Base platform supports systematic causal inference across the human phenome. *Elife*. 2018;7.  
9  
10 44. Hemani G, Tilling K, Davey Smith G. Orienting the causal relationship between  
11 imprecisely measured traits using GWAS summary data. *PLOS Genetics*.  
12 2017;13(11):e1007081.  
13  
14 45. Schmidt AF, Finan C, Gordillo-Marañón M, Asselbergs FW, Freitag DF, Patel RS, et  
15 al. Genetic drug target validation using Mendelian randomisation. *Nature Communications*.  
16 2020;11(1):3255.  
17  
18 46. Chang CC, Chow CC, Tellier LC, Vattikuti S, Purcell SM, Lee JJ. Second-generation  
19 PLINK: rising to the challenge of larger and richer datasets. *GigaScience*. 2015;4(1).  
20  
21 47. Purcell S, Neale B, Todd-Brown K, Thomas L, Ferreira MA, Bender D, et al. PLINK:  
22 a tool set for whole-genome association and population-based linkage analyses. *Am J Hum*  
23 *Genet*. 2007;81(3):559-75.  
24  
25 48. Auton A, Brooks LD, Durbin RM, Garrison EP, Kang HM, Korbel JO, et al. A global  
26 reference for human genetic variation. *Nature*. 2015;526(7571):68-74.  
27  
28 49. Gaziano L, Giambartolomei C, Pereira AC, Gaulton A, Posner DC, Swanson SA, et  
29 al. Actionable druggable genome-wide Mendelian randomization identifies repurposing  
30 opportunities for COVID-19. *Nature Medicine*. 2021;27(4):668-76.  
31  
32 50. Burgess S, Zuber V, Valdes-Marquez E, Sun BB, Hopewell JC. Mendelian  
33 randomization with fine-mapped genetic data: Choosing from large numbers of correlated  
34 instrumental variables. *Genet Epidemiol*. 2017;41(8):714-25.  
35  
36 51. Porcu E, Rüeger S, Lepik K, Agbessi M, Ahsan H, Alves I, et al. Mendelian  
37 randomization integrating GWAS and eQTL data reveals genetic determinants of complex  
38 and clinical traits. *Nature Communications*. 2019;10(1):3300.  
39  
40 52. Alessy SA, Davies EA, Rawlinson J, Baker M, Lüchtenborg M. How representative  
41 are colorectal, lung, breast and prostate cancer patients responding to the National Cancer  
42 Patient Experience Survey (CPES) of the cancer registry population in England? A  
43 population-based case control study. *BMJ Open*. 2019;9(12):e034344.  
44  
45 53. Sandru A, Voinea S, Panaitescu E, Blidaru A. Survival rates of patients with  
46 metastatic malignant melanoma. *J Med Life*. 2014;7(4):572-6.  
47  
48 54. Cheeseman S, Levick B, Sopwith W, Fenton H, Nam EJ, Kim D, et al. Ovarian Real-  
49 World International Consortium (ORWIC): A multicentre, real-world analysis of epithelial  
50 ovarian cancer treatment and outcomes. *Frontiers in Oncology*. 2023;13.  
51  
52 55. Owzar K, Li Z, Cox N, Jung SH. Power and sample size calculations for SNP  
53 association studies with censored time-to-event outcomes. *Genet Epidemiol*. 2012;36(6):538-  
54 48.  
55  
56 56. Zheng J, Haberland V, Baird D, Walker V, Haycock PC, Hurle MR, et al. Phenome-  
57 wide Mendelian randomization mapping the influence of the plasma proteome on complex  
58 diseases. *Nature Genetics*. 2020;52(10):1122-31.  
59  
60 57. Robinson JW, Hemani G, Babaei MS, Huang Y, Baird DA, Tsai EA, et al. An efficient  
and robust tool for colocalisation: Pair-wise Conditional and Colocalisation (PWCoCo).  
bioRxiv. 2022:2022.08.08.503158.  
58  
59 58. Mitchell RE, Hartley A, Walker VM, Gkatzionis A, Yarmolinsky J, Bell JA, et al.  
Strategies to investigate and mitigate collider bias in genetic and Mendelian randomization  
studies of disease progression. medRxiv. 2022:2022.04.22.22274166.



- 1  
2  
3 59. Mahmoud O, Dudbridge F, Davey Smith G, Munafo M, Tilling K. A robust method  
4 for collider bias correction in conditional genome-wide association studies. *Nature*  
5 *Communications*. 2022;13(1):619.  
6  
7 60. Cai S, Hartley A, Mahmoud O, Tilling K, Dudbridge F. Adjusting for collider bias in  
8 genetic association studies using instrumental variable methods. *Genet Epidemiol*.  
9 2022;46(5-6):303-16.  
10  
11 61. Schumacher FR, Berndt SI, Siddiq A, Jacobs KB, Wang Z, Lindstrom S, et al.  
12 Genome-wide association study identifies new prostate cancer susceptibility loci. *Hum Mol*  
13 *Genet*. 2011;20(19):3867-75.  
14  
15  
16

## 17 **AUTHORS' CONTRIBUTIONS**

18  
19 JY and PCH: Conceptualization, Methodology, Writing - Review & Editing, Supervision;  
20 RMM: Writing - Review & Editing, Supervision; TB: Writing - Original Draft.  
21  
22  
23  
24

## 25 **FUNDING STATEMENT**

26  
27 RMM is a National Institute for Health Research Senior Investigator (NIHR202411). RMM,  
28 JY, and PCH are supported by a Cancer Research UK 25 (C18281/A29019) programme grant  
29 (the Integrative Cancer Epidemiology Programme). RMM is also supported by the NIHR  
30 Bristol Biomedical Research Centre which is funded by the NIHR (BRC-1215-20011) and is  
31 a partnership between University Hospitals Bristol and Weston NHS Foundation Trust and  
32 the University of Bristol. RMM is affiliated with the Medical Research Council Integrative  
33 Epidemiology Unit at the University of Bristol which is supported by the Medical Research  
34 Council (MC\_UU\_00011/1, MC\_UU\_00011/3, MC\_UU\_00011/6, and MC\_UU\_00011/4)  
35 and the University of Bristol. Department of Health and Social Care disclaimer: The views  
36 expressed are those of the author(s) and not necessarily those of the NHS, the NIHR or the  
37 Department of Health and Social Care.  
38  
39  
40

41 TB is supported by grant MR/W006308/1 for the GW4 BIOMED MRC DTP, awarded to the  
42 Universities of Bath, Bristol, Cardiff and Exeter from the Medical Research Council  
43 (MRC)/UKRI.  
44  
45  
46  
47

## 48 **COMPETING INTERESTS**

49  
50 RM, JY and PCH have received funding from Cancer Research UK. TB receives funding  
51 from the GW4 BIOMED MRC DTP.  
52  
53  
54  
55  
56  
57  
58  
59  
60

## SUPPLEMENTARY MATERIAL

Supplementary table 1: Medicines and Healthcare products Regulatory Agency indications of anti-programmed cell death protein 1 (PD-1) and anti-programmed cell death ligand 1 (PD-L1) monoclonal antibodies obtained 25<sup>th</sup> March 2023 (\* represents monotherapy indications and \*\* represents indications as part of combination therapy).

Molecular markers: epidermal growth factor receptor gene (EGFR), anaplastic lymphoma kinase gene (ALK), c-ros oncogene 1 gene (ROS1), deficient mismatch repair (dMMR), microsatellite instability high (MSI-H), combined positive score (CPS), tumour proportion score (TPS).

Cancers: non-small cell lung cancer (NSCLC), triple-negative breast cancer (TNBC), small cell lung cancer (SCLC).

| Target | Drug               | Cancer                                                                                                                                                                                                             |                                                                                                                                                                                                        |                                                                                                                                                                                                                                          |                                                                                                                                                                                     |         |          |
|--------|--------------------|--------------------------------------------------------------------------------------------------------------------------------------------------------------------------------------------------------------------|--------------------------------------------------------------------------------------------------------------------------------------------------------------------------------------------------------|------------------------------------------------------------------------------------------------------------------------------------------------------------------------------------------------------------------------------------------|-------------------------------------------------------------------------------------------------------------------------------------------------------------------------------------|---------|----------|
|        |                    | Breast                                                                                                                                                                                                             | Colorectal                                                                                                                                                                                             | Lung                                                                                                                                                                                                                                     | Melanoma                                                                                                                                                                            | Ovarian | Prostate |
| PD-1   | Cemiplimab (16)    | -                                                                                                                                                                                                                  | -                                                                                                                                                                                                      | <ul style="list-style-type: none"> <li>Metastatic or locally advanced PD-L1 <math>\geq</math> 50% TPS NSCLC (EGFR, ALK, ROS1 wild-type)*</li> </ul>                                                                                      | -                                                                                                                                                                                   | -       | -        |
|        | Dostarlimab (17)   | -                                                                                                                                                                                                                  | -                                                                                                                                                                                                      | -                                                                                                                                                                                                                                        | -                                                                                                                                                                                   | -       | -        |
|        | Nivolumab (18)     | -                                                                                                                                                                                                                  | <ul style="list-style-type: none"> <li>dMMR/MSI-H colorectal cancer following chemotherapy**</li> </ul>                                                                                                | <ul style="list-style-type: none"> <li>Metastatic NSCLC (EGFR, ALK wild type)**</li> <li>Metastatic or locally advanced NSCLC following chemotherapy*</li> <li>Resectable NSCLC**</li> </ul>                                             | <ul style="list-style-type: none"> <li>Metastatic or unresectable melanoma***</li> <li>Metastatic or lymph node-involved melanoma patients following complete resection*</li> </ul> | -       | -        |
|        | Pembrolizumab (19) | <ul style="list-style-type: none"> <li>Locally advanced or early-stage TNBC with high risk of recurrence***</li> <li>Metastatic or locally recurrent unresectable PD-L1 CPS <math>\geq</math> 10 TNBC**</li> </ul> | <ul style="list-style-type: none"> <li>Treatment-naïve metastatic dMMR/MSI-H colorectal cancer*</li> <li>Metastatic or unresectable dMMR/MSI-H colorectal cancer following prior treatment*</li> </ul> | <ul style="list-style-type: none"> <li>Metastatic NSCLC with PD-L1 <math>\geq</math> 50% TPS (EGFR, ALK wild-type)***</li> <li>Metastatic or locally advanced PD-L1 <math>\geq</math> 1% TPS NSCLC following chemotherapy and</li> </ul> | <ul style="list-style-type: none"> <li>Metastatic or unresectable melanoma*</li> <li>Completely resected stage IIB, IIC, III melanoma*</li> </ul>                                   | -       | -        |

1  
2  
3  
4  
5  
6  
7  
8  
9  
10  
11  
12  
13  
14  
15  
16  
17  
18  
19  
20  
21  
22  
23  
24  
25  
26  
27  
28  
29  
30  
31  
32  
33  
34  
35  
36  
37  
38  
39  
40  
41  
42  
43  
44  
45  
46

|       |                   |                                                                                                        |   |                                                                                                                                                                                                                                                                                                                                                                                                                                        |   |   |   |
|-------|-------------------|--------------------------------------------------------------------------------------------------------|---|----------------------------------------------------------------------------------------------------------------------------------------------------------------------------------------------------------------------------------------------------------------------------------------------------------------------------------------------------------------------------------------------------------------------------------------|---|---|---|
|       |                   |                                                                                                        |   | targeted therapy (if applicable)*                                                                                                                                                                                                                                                                                                                                                                                                      |   |   |   |
| PD-L1 | Atezolizumab (20) | <ul style="list-style-type: none"> <li>Metastatic or locally advanced PD-L1 ≥ 1% TPS TNBC**</li> </ul> | - | <ul style="list-style-type: none"> <li>Completely resected stage II-III NSCLC with PD-L1 ≥ 50% and no progression on prior chemotherapy*</li> <li>Metastatic non-squamous NSCLC**</li> <li>Metastatic NSCLC PD-L1 ≥ 50% TPS (<i>EGFR</i>, <i>ALK</i> wild-type)*</li> <li>Metastatic or locally advanced NSCLC following chemotherapy and targeted therapy (if applicable)*</li> <li>Treatment-naïve extensive stage SCLC**</li> </ul> | - | - | - |
|       | Avelumab (21)     | -                                                                                                      | - | -                                                                                                                                                                                                                                                                                                                                                                                                                                      | - | - | - |
|       | Durvalumab (22)   | -                                                                                                      | - | <ul style="list-style-type: none"> <li>Locally advanced unresectable PD-L1 ≥ 1% TPS NSCLC without progression on chemoradiation*</li> <li>Treatment-naïve extensive-stage SCLC**</li> </ul>                                                                                                                                                                                                                                            | - | - | - |

# BMJ Open

## Investigating the association between genetically proxied circulating levels of immune checkpoint proteins and cancer survival: protocol for a Mendelian randomisation analysis

|                                 |                                                                                                                                                                                                                                                                                                                                                                                                            |
|---------------------------------|------------------------------------------------------------------------------------------------------------------------------------------------------------------------------------------------------------------------------------------------------------------------------------------------------------------------------------------------------------------------------------------------------------|
| Journal:                        | <i>BMJ Open</i>                                                                                                                                                                                                                                                                                                                                                                                            |
| Manuscript ID                   | bmjopen-2023-075981.R1                                                                                                                                                                                                                                                                                                                                                                                     |
| Article Type:                   | Protocol                                                                                                                                                                                                                                                                                                                                                                                                   |
| Date Submitted by the Author:   | 10-Oct-2023                                                                                                                                                                                                                                                                                                                                                                                                |
| Complete List of Authors:       | Bate, Tessa; University of Bristol<br>Martin, Richard; University of Bristol, ; NIHR Bristol Biomedical Research Centre, University Hospitals Bristol and Weston NHS Foundation Trust and the University of Bristol<br>Yarmolinsky, James; University of Bristol; Imperial College London, Department of Epidemiology and Biostatistics, School of Public Health<br>Haycock, Philip; University of Bristol |
| <b>Primary Subject Heading</b>: | Oncology                                                                                                                                                                                                                                                                                                                                                                                                   |
| Secondary Subject Heading:      | Genetics and genomics                                                                                                                                                                                                                                                                                                                                                                                      |
| Keywords:                       | ONCOLOGY, Cancer genetics < GENETICS, Prognosis, THERAPEUTICS                                                                                                                                                                                                                                                                                                                                              |
|                                 |                                                                                                                                                                                                                                                                                                                                                                                                            |

SCHOLARONE™  
Manuscripts

1  
2  
3 1 **Investigating the association between genetically proxied circulating levels of immune**  
4 2 **checkpoint proteins and cancer survival: protocol for a Mendelian randomisation**  
5 3 **analysis**  
6 4

7 4  
8 5 Tessa Bate<sup>1,2</sup>, Richard M Martin<sup>1-3</sup>, James Yarmolinsky<sup>1,2,4\*</sup>, Philip C Haycock<sup>1,2\*</sup>  
9 6

10 7 <sup>1</sup> Medical Research Council Integrative Epidemiology Unit, University of Bristol  
11 8

12 9 <sup>2</sup> Population Health Sciences, Bristol Medical School, University of Bristol  
13 10

14 11 <sup>3</sup> NIHR Bristol Biomedical Research Centre, University Hospitals Bristol and Weston NHS  
15 12 Foundation Trust and the University of Bristol  
16 13

17 14 <sup>4</sup> Department of Epidemiology and Biostatistics, School of Public Health, Imperial College  
18 15 London  
19 16

20 17 \*Contributed equally  
21 18

22 19 **Correspondence to:**  
23 20

24 21 Philip C Haycock: [philip.haycock@bristol.ac.uk](mailto:philip.haycock@bristol.ac.uk)  
25 22

26 23 James Yarmolinsky: [j.yarmolinsky@imperial.ac.uk](mailto:j.yarmolinsky@imperial.ac.uk)  
27 24  
28 25  
29 26  
30 27  
31 28  
32 29  
33 30  
34 31  
35 32  
36 33  
37 34  
38 35  
39 36  
40 37  
41 38  
42 39  
43 40  
44 41  
45 42  
46 43  
47 44  
48 45  
49 46  
50 47  
51 48  
52 49  
53 50  
54 51  
55 52  
56 53  
57 54  
58 55  
59 56  
60 57

21 **ABSTRACT**

22 **Introduction**

23 Compared to the traditional drug development pathway, investigating alternative uses for  
24 existing drugs (i.e., drug repurposing) requires substantially less time, cost, and resources.  
25 Immune checkpoint inhibitors are licensed for the treatment of certain breast, colorectal, head  
26 and neck, lung and melanoma cancers. These drugs target immune checkpoint proteins to  
27 reduce the suppression of T cell activation by cancer cells. As T cell suppression is a  
28 hallmark of cancer common across anatomical sites, we hypothesise that immune checkpoint  
29 inhibitors could be repurposed for the treatment of additional cancers beyond the ones  
30 already indicated.  
31

32 **Methods and analysis**

33 We will use two-sample Mendelian randomisation to investigate the effect of genetically  
34 proxied levels of protein targets of two immune checkpoint inhibitors - programmed cell  
35 death protein 1 (PD-1) and programmed death ligand 1 (PD-L1) - on survival of seven cancer  
36 types (breast, colorectal, head and neck, lung, melanoma, ovarian, and prostate). Summary  
37 genetic association data will be obtained from prior genome-wide association studies of  
38 circulating protein levels and cancer survival in populations of European ancestry. Various  
39 sensitivity analyses will be performed to examine the robustness of findings to potential  
40 violations of Mendelian randomisation assumptions, collider bias and the impact of  
41 alternative genetic instrument construction strategies. The impact of treatment history and  
42 tumour stage on the findings will also be investigated using summary-level and individual-  
43 level genetic data where available.  
44

45 **Ethics and dissemination**

46 No separate ethics approval will be required for these analyses as we will be using data from  
47 previously published genome-wide association studies which individually gained ethical  
48 approval and participant consent. Results from analyses will be submitted for publication in  
49  
50  
51  
52  
53  
54  
55  
56  
57  
58  
59  
60

1 an open access peer-reviewed journal and statistical code will be made freely available upon  
2 the completion of the analysis.  
3

#### 4 **STRENGTHS AND LIMITATIONS OF THIS STUDY**

- 5 • As germline genetic variants proxying circulating protein levels are randomly assorted at  
6 meiosis and fixed at conception, Mendelian randomisation analyses examining the effect  
7 of these proteins on cancer survival should be less prone to conventional issues of  
8 confounding and cannot be influenced by reverse causation bias.
- 9 • The use of a two-sample Mendelian randomisation framework will permit us to leverage  
10 large-scale genetic association data from separate samples, thus enhancing statistical  
11 power and precision of estimates.
- 12 • The generalisability of our findings to populations of non-European ancestry may be  
13 unclear.
- 14 • Mendelian randomisation analysis can only evaluate the on-target effects of immune  
15 checkpoint inhibitors.
- 16 • Sample sizes of genome-wide association studies of cancer survival are low in  
17 comparison to cancer risk, which will limit the statistical power of our analyses.

#### 19 **INTRODUCTION**

20 Drug repurposing is the use of approved drugs for another indication (1, 2). The traditional  
21 development and testing pathway of candidate drugs is expensive and time-consuming, with  
22 an estimated cost of \$2-3 billion USD and 13 years of research on average required for a  
23 chemical compound to be approved for use in clinical practice (3). In contrast, drugs that are  
24 tested for a repurposed use should already have demonstrated success in phase I trials for  
25 their original indication and thus their safety profiles for human use are known (3-6).  
26 Consequently, clinical testing for a repurposed use of a drug can begin at phase II trials,  
27 reducing associated time and resource requirements (3-6).

28  
29 Despite advances in screening and treatment strategies, the number of people diagnosed with,  
30 and dying from cancer, continues to increase. Globally, there were estimated to be 19.3  
31 million new cancer diagnoses and 10.0 million cancer deaths in 2020 (7). Seven cancer sites  
32 (breast, colorectal, head and neck, lung, melanoma skin, ovarian, and prostate cancer) were  
33 estimated to contribute to 48% of the incidence and 45% of mortality from all cancer sites  
34 globally in 2020 (7). In addition to the high burden of cancer, there are issues associated with  
35 currently available treatments such as development of resistance, severity of side effects, and  
36 lack of efficacy in some individuals (8). Identifying new strategies for the treatment of these  
37 high-burden cancers using drug repurposing could minimise the cost and patient involvement  
38 required for the assessment of their efficacy. Several drugs have been successfully  
39 repurposed for cancer treatment, including non-cancer drugs such as thalidomide which was  
40 originally developed to treat morning sickness in pregnancy but is now approved to treat  
41 multiple myeloma (3, 8, 9).

42  
43 Shared hallmarks of cancer common to different cancer sites represent an opportunity for  
44 drug repurposing using approved drugs which target these mechanisms across multiple sites

1  
2  
3 1 (3). One such hallmark is the avoidance of immune destruction, which can be suppressed  
4 2 using immune checkpoint inhibitors (3, 10, 11). The first immune checkpoint inhibitor  
5 3 approved by the US Food and Drug Administration (FDA) was the anti-cytotoxic T-  
6 4 lymphocyte associated protein 4 (CTLA-4) monoclonal antibody, ipilimumab, for the  
7 5 treatment of melanoma in 2011 (10). Following the approval of ipilimumab, several other  
8 6 immune checkpoint inhibitors have also been approved for a range of cancer indications.  
9 7

10 8 Two examples of immune checkpoint proteins which have been successfully targeted in  
11 9 cancer treatment are programmed cell death protein 1 (PD-1) and programmed cell death  
12 10 ligand 1 (PD-L1) (10). The anti-PD-1 monoclonal antibodies include cemiplimab (Libtayo),  
13 11 dostarlimab (Jemperli), nivolumab (Opdivo) and pembrolizumab (Keytruda), and the anti-  
14 12 PD-L1 monoclonal antibodies include atezolizumab (Tecentriq), avelumab (Bavencio) and  
15 13 durvalumab (Imfinzi) (10, 12). These seven immune checkpoint inhibitors have been  
16 14 approved by the Medicines and Healthcare products Regulatory Agency (MHRA) for specific  
17 15 cancer indications, including some indications for the seven cancer types detailed above  
18 16 (Table 1, Supplementary Table 1). Across anti-PD-1 immune checkpoint inhibitors, there are  
19 17 approved indications for the treatment of breast, colorectal, head and neck, and lung cancers  
20 18 and melanoma, whilst anti-PD-L1 immune checkpoint inhibitors have been approved for  
21 19 breast and lung cancer treatment (13-19) (Table 1, Supplementary Table 1).  
22 20

23 21 The approvals for anti-PD-1 and anti-PD-L1 immune checkpoint inhibitors are not uniform  
24 22 across cancer sites, even for the drugs targeting the same immune checkpoint protein (Table  
25 23 1). However, this may be explained by an absence, rather than failure, of comparable clinical  
26 24 trials for certain drugs within these drug target categories. For example, pembrolizumab is the  
27 25 only anti-PD-1 immune checkpoint inhibitor approved for a breast cancer indication by the  
28 26 MHRA (16) (Table 1), likely due to lack of complete late-stage clinical trials with large  
29 27 sample sizes investigating the efficacy of the other three anti-PD-1 immune checkpoint  
30 28 inhibitors (20, 21). Similarly, although nivolumab and pembrolizumab both have colorectal  
31 29 cancer indications, there are differences in the characteristics of the patient populations that  
32 30 they are approved to treat (15, 16) (Table 1, Supplementary Table 1). Nivolumab is approved  
33 31 to treat mismatch repair deficient (dMMR) or microsatellite instability high (MSI-H)  
34 32 colorectal cancer patients after chemotherapy as part of a combination therapy with  
35 33 ipilimumab (15) (Supplementary Table 1). In contrast, pembrolizumab as monotherapy is  
36 34 approved to treat metastatic or unresectable dMMR/MSI-H colorectal cancer, the latter  
37 35 following previous treatment (16) (Supplementary Table 1).  
38 36

39 37 The approved indications of these immune checkpoint inhibitors are highly specific in many  
40 38 cases, particularly with respect to molecular tumour markers and treatment history. For  
41 39 example, durvalumab has been approved by the MHRA for the treatment of adult patients  
42 40 with locally advanced, unresectable non-small cell lung cancer if at least 1% of their tumour  
43 41 cells express PD-L1 and their disease did not advance after previous platinum-based  
44 42 chemoradiotherapy (19) (Supplementary Table 1). The populations in clinical trials tend to be  
45 43 selected based on prior evidence of anti-proliferative or anti-tumour responses and favourable  
46 44 pharmacodynamics and pharmacokinetics in pre-clinical studies and early-stage trials (22).  
47 45 For example, trials investigating the efficacy of anti-PD-L1 immune checkpoint inhibitors for  
48 46 ovarian cancer treatment have largely been restricted to evaluating treatment-naïve advanced  
49 47 stage (stage III-IV) epithelial ovarian cancer patients, but have not been successful (23-27)  
50 48 (Table 1, Supplementary Table 1).  
51 49  
52 50  
53 51  
54 52  
55 53  
56 54  
57 55  
58 56  
59 57  
60 58

**Table 1.** Medicines and Healthcare products Regulatory Agency (MHRA) indications of anti-programmed cell death protein 1 (PD-1) and anti-programmed cell death ligand 1 (PD-L1) monoclonal antibodies, obtained 25<sup>th</sup> March 2023

| Protein target | Immune checkpoint inhibitor | Cancer |            |               |      |          |         |          |
|----------------|-----------------------------|--------|------------|---------------|------|----------|---------|----------|
|                |                             | Breast | Colorectal | Head and neck | Lung | Melanoma | Ovarian | Prostate |
| PD-1           | Cemiplimab (13)             | -      | -          | -             | A    | -        | -       | -        |
|                | Dostarlimab (14)            | -      | -          | -             | -    | -        | -       | -        |
|                | Nivolumab (15)              | -      | A          | A             | A    | A        | -       | -        |
|                | Pembrolizumab (16)          | A      | A          | A             | A    | A        | -       | -        |
| PD-L1          | Atezolizumab (17)           | A      | -          | -             | A    | -        | -       | -        |
|                | Avelumab (18)               | -      | -          | -             | -    | -        | -       | -        |
|                | Durvalumab (19)             | -      | -          | -             | A    | -        | -       | -        |

“A” represents immune checkpoint inhibitors with at least one approved indication for the cancer type either as monotherapy or as part of combination therapy).

The interaction between PD-L1 on the surface of cancer cells and PD-1 on the surface of activated T cells suppresses further T cell activation (10, 20, 21, 28). Therefore, PD-1/L1 inhibitors suppress this interaction and so support T cell activation during anti-cancer immune responses (10, 12). Whilst PD-1 is largely expressed on immune cells, PD-L1 is expressed on a wider variety of non-haematopoietic cells, including tumour cells (29-32). Although there is uncertainty over the prognostic value of blood-based measures, previous studies have found that higher circulating (i.e. blood-based) PD-1 and PD-L1 levels are associated with poorer prognosis for patients diagnosed with cancer at different anatomical sites. For example, higher plasma soluble PD-1 and PD-L1 expression levels were associated with decreased progression-free survival for patients with advanced-stage high-grade serous ovarian cancer compared to those with lower PD-1 and PD-L1 expression (33). However, when accounting for other clinical factors in multivariable analyses, only soluble PD-L1 expression levels remained associated with progression-free survival for these patients (33). Higher circulating soluble PD-L1 expression was also associated with decreased overall and progression-free survival in a meta-analysis of patients with cancer at different anatomical sites, including non-small cell lung cancer and melanoma patients who had been treated with immunotherapy (34). In contrast, although low serum exosomal PD-L1 expression was associated with increased median overall survival for pancreatic ductal adenocarcinoma patients compared to those with high exosomal PD-L1 expression, there was little statistical evidence to support this observed difference (35). Therefore, even though the prognostic roles of circulating PD-1 and PD-L1 expression levels have not been fully determined, there is some evidence supporting an association between blood-based measures of these immune checkpoint proteins and cancer survival, and the mechanism of action of these drugs is mediated by T cells (33-35).



## **Mendelian randomisation**

Mendelian randomisation (MR) investigates the association between an exposure and outcome using genetic variants associated with the exposure as a proxy for the exposure of interest (1). Two-sample MR uses measurements of genetic variant-exposure and genetic variant-outcome associations from separate studies, permitting analyses to leverage large-scale genetic association data for protein measures and cancer survival (36, 37).

MR should be less vulnerable to conventional issues of confounding, as genetic germline variants are randomly assorted at meiosis (5, 36-42). As germline genetic variants are fixed and cannot be influenced by subsequent disease status, MR analyses are immune to reverse causation bias (5, 36-40). Since MR analyses often utilise existing genetic association data, causal relationships can be tested in a more cost-effective and time-efficient manner than in randomised controlled trials (1, 36-38, 40).

### **Aims**

The aim of this study is to investigate the association between genetically proxied PD-1 and PD-L1 protein levels and survival of seven cancer types (breast, colorectal, head and neck, lung, melanoma, ovarian, and prostate). These seven cancer sites have been chosen for inclusion as they have the most well-powered and accessible genome-wide association study (GWAS) survival data and make an important contribution to the overall global cancer burden.

These analyses will enable us to evaluate the repurposing potential of PD-1 and PD-L1 to new cancer indications. This will include potential repurposing to cancers without any existing approvals, as well as repurposing to new patient populations for cancers with some existing approvals. Previous MR studies have focused almost exclusively on causes of cancer risk. By including cancers with approved indications for PD-1 and PD-L1 inhibitors, which serves as a positive control, our analyses will also provide insight into the applicability of MR to studies of cancer survival.

## **METHODS AND ANALYSIS**

### **Exposures**

Rather than investigating the efficacy of specific immune checkpoint inhibitor compounds, their on-target effects will be proxied using genetic instruments which represent decreased circulating levels of their protein targets, PD-1 and PD-L1. Since our primary instruments will be based on studies in blood, we anticipate that our analyses may not fully proxy the mechanism of PD-1 and PD-L1 inhibitors in all biologically relevant tissues, an issue we will address in instrument validation analyses (see below).

Single-nucleotide polymorphisms (SNPs) associated with circulating PD-1 or PD-L1 expression levels will be used to proxy expression of these proteins. These genetic instruments will be selected from a GWAS of circulating proteins in 54,306 participants of European ancestry in the UK Biobank cohort (43). Statistical analysis, imputation, quality control, and protein expression quantification in this study have been described previously (43).

## 1 Outcomes

2 Genetic association data will be obtained from GWAS of cancer survival in individuals of  
3 European ancestry with breast (44), colorectal (45), head and neck (unpublished), lung  
4 (unpublished), melanoma (46), ovarian (47) and prostate cancer (47). The outcome in each  
5 GWAS was defined as cancer-specific mortality, except for the lung and head and neck  
6 cancer GWAS which defined the outcomes as all-cause mortality, and the ovarian cancer  
7 GWAS which examined both progression-free survival and overall survival (all-cause) as  
8 outcomes (44-48). To increase statistical power, we will combine the consortium site-specific  
9 GWAS with additional studies of cancer survival in Genomics England (unpublished) (Table  
10 2).

11  
12 **Table 2.** Number of patients and mortality events occurring in the site-specific consortium  
13 genome-wide association study (GWAS) and Genomics England GWAS for each cancer site

| Cancer site   | Number of patients      |                  |        | Number of events       |                  |       |
|---------------|-------------------------|------------------|--------|------------------------|------------------|-------|
|               | Consortium GWAS         | Genomics England | Total  | Consortium GWAS        | Genomics England | Total |
| Breast        | 91,686<br>(44)          | 2,183            | 93,869 | 7,531<br>(44)          | 238              | 7,769 |
| Colorectal    | 16,964<br>(45)          | 2,190            | 19,154 | 4,010<br>(45)          | 541              | 4,551 |
| Head and neck | 10,000<br>(unpublished) | 196              | 10,196 | 3,300<br>(unpublished) | 74               | 3,374 |
| Lung          | 10,036<br>(unpublished) | 1,318            | 11,354 | 6,088<br>(unpublished) | 592              | 6,680 |
| Melanoma      | 10,982<br>(46)          | 219              | 11,201 | 1,041<br>(46)          | 108              | 1,149 |
| Ovarian       | 2,901<br>(47)           | 494              | 3,395  | 1,656*                 | 217              | 1,873 |
| Prostate      | 24,023<br>(48)          | -**              | 24,023 | 3,513<br>(48)          | -**              | 3,513 |

14 The head and neck, lung and ovarian cancer mortality events are from all causes, whilst the mortality events for  
15 the other cancer sites are cancer site-specific.

16 \*The number of mortality events in the ovarian cancer GWAS was estimated based on the event rate of 11  
17 OCAC studies (AUS, BAV, BEL, HAW, HSK, MAC, MAL, MAY, NCO, NEC, PVD) (0.571) (49) and the  
18 ovarian cancer GWAS sample size (2,901) (47).

19 \*\*There were fewer than 50 prostate cancer patients included in the Genomics England survival GWAS so these  
20 will not be combined with the site-specific prostate cancer GWAS.

## 21 Data harmonisation

22 Harmonisation of genetic data is the process by which the exposure and outcome GWAS  
23 summary statistics are joined together and oriented to reflect the same effect alleles.  
24 Therefore, harmonised data will only include SNPs which were common to both the protein  
25 expression and respective cancer survival GWAS.  
26

27  
28 Harmonisation will be performed using the `harmonise_data` function from the  
29 TwoSampleMR R package (<https://mrcieu.github.io/TwoSampleMR/>) (50, 51). This will use  
30 the function's default option which infers the positive strand using allele frequencies for  
31 palindromic SNPs (<https://mrcieu.github.io/TwoSampleMR/>) (50, 51). The correlation  
32 between exposure and outcome GWAS SNP effect allele frequencies will be compared  
33 following data harmonisation. If data harmonisation has been successful, the correlation

1 coefficient would be expected to be close to 1, as this would suggest that the same alleles  
2 have been chosen as the effect allele in both GWAS summary statistic datasets.

### 3 4 **Mendelian randomisation**

#### 5 Assumptions

6 There are three key assumptions of MR: relevance, exchangeability, and exclusion restriction  
7 (39, 42). The relevance assumption states that the genetic instrument must be associated with  
8 the exposure of interest, for example in this study the circulating levels of the drugs' protein  
9 target (36, 42). The second MR assumption, exchangeability, requires there are no common  
10 causes of the instrument and outcome (36, 42). The final MR assumption, exclusion  
11 restriction, states that there must be no horizontal pleiotropy (36, 38-41, 52). Horizontal  
12 pleiotropy occurs when there are additional pathways between the instruments and outcome,  
13 independent of the exposure (36, 42, 52).

#### 14 Genetic instrument selection

15 The UK Biobank protein expression GWAS summary statistics (43) will be used to select  
16 SNPs associated with circulating PD-1 or PD-L1 concentration. The genomic regions of the  
17 genes encoding PD-1 (*PDCDI*, chr2:241849884 – 241858894 in human genome build 38  
18 (hg38)) and PD-L1 (*CD274*, chr9:5450503 – 5470566 in hg38) will be used to define *cis* and  
19 *trans* genetic instruments based on different window sizes.

20  
21 To minimise vulnerability to horizontal pleiotropy, only SNPs within and in proximity to the  
22 gene encoding the target protein, known as *cis* SNPs, will be included in genetic instrument  
23 sets for the main analyses (52). *Cis* instruments to proxy both proteins will be constructed in  
24 PLINK version 1.9 (53, 54) using SNPs in or within 500 kilobases (kb) from *PDCDI* or  
25 *CD274* that are associated with expression of these proteins ( $P < 5 \times 10^{-6}$ ) at linkage  
26 disequilibrium (LD)  $r^2 < 0.30$  (based on clumping with a random sample of 10,000 European  
27 participants from the UK Biobank) (5, 52, 55).

#### 28 Estimator

29 Where the genetic instrument consists of one SNP, the Wald ratio will be used to assess the  
30 association between a protein instrumented by this SNP and cancer survival (6, 40, 56).

31 Where a genetic instrument consists of two or more SNPs, the inverse-variance weighted  
32 (IVW) method will instead be used to investigate the association between a protein  
33 instrumented by these SNPs and cancer survival (6, 40, 56). Any LD between SNPs included  
34 in an instrument will be accounted for in analysis using a SNP correlation matrix based on a  
35 random sample of 10,000 participants of European ancestry from the UK Biobank (42, 55,  
36 57). Heterogeneity of MR results across independent SNPs included in the genetic instrument  
37 sets will be assessed using Cochran's Q tests and MR results will be compared across each  
38 SNP in the instrument by visual inspection (36, 40, 58).

39 The protein expression GWAS included age, sex, age-sex interaction terms, protein  
40 expression level measurement batch, UK Biobank centre, genotyping array, the first twenty  
41 principal components (PCs) of genetic ancestry, and duration between blood sample  
42 collection and protein expression measurement as covariates (43).

43  
44 Aside from the breast cancer GWAS which did not adjust for any covariates, the cancer site-  
45 specific GWAS were all adjusted for genetic PCs (although for different numbers of PCs)  
46 (44-48). The colorectal cancer survival GWAS additionally adjusted for age at diagnosis, sex,

genotyping platform and study where the data originated from (45). The head and neck cancer GWAS which will be additionally adjusted for age, sex, stage at diagnosis (stratified as early or late stage), and cancer sub-type, The lung cancer survival GWAS also adjusted for age and sex, and separated participants into early-stage (stage I-II), late-stage (stage III-IV) and all stage analyses (unpublished). The melanoma survival GWAS included age and sex as covariates in addition to genotyping batch for one cohort (46). For the ovarian cancer survival GWAS, the primary study, residual disease, tumour stage, histology, tumour grade, and age were also adjusted for (47). The prostate cancer survival GWAS additionally included age, diagnostic prostate specific antigen (PSA) level and Gleason score as covariates (48).

### Power

Using the UK Biobank protein expression GWAS (43), the lead *cis* SNP for *PDCD1* (rs1011514130) explained approximately 2.97% of the variation in circulating PD-1 expression level whilst the lead *cis* SNP for *CD274* (rs822340) explained approximately 4.83% of the variation in PD-L1 expression level.

Across all seven cancer types, there is an estimated power of 80% to detect hazard ratios of at least  $\geq 1.61$  or  $\leq 0.62$  per unit decrease in normalised protein expression levels (alpha set to 5%) (Table 3).

**Table 3.** Estimated number of participants (N), mortality event rate, median survival, and hazard ratio (HR) per standard deviation decrease detectable with 80% power for each cancer site

| Cancer        | N      | Event rate | Median survival (months) | HRs detectable at estimated 80% power |                                  |
|---------------|--------|------------|--------------------------|---------------------------------------|----------------------------------|
|               |        |            |                          | PD-1                                  | PD-L1                            |
| Breast        | 93,869 | 0.083      | 64.8 (59)                | HR $\geq 1.20$<br>HR $\leq 0.83$      | HR $\geq 1.17$<br>HR $\leq 0.86$ |
| Colorectal    | 19,154 | 0.238      | 38.4 (59)                | HR $\geq 1.27$<br>HR $\leq 0.78$      | HR $\geq 1.22$<br>HR $\leq 0.82$ |
| Head and neck | 10,196 | 0.331*     | 54.3 (60)                | HR $\geq 1.33$<br>HR $\leq 0.75$      | HR $\geq 1.26$<br>HR $\leq 0.79$ |
| Lung          | 11,354 | 0.588*     | 3.6 (59)                 | HR $\geq 1.22$<br>HR $\leq 0.82$      | HR $\geq 1.18$<br>HR $\leq 0.85$ |
| Melanoma      | 11,201 | 0.103      | 53.4 (61)                | HR $\geq 1.61$<br>HR $\leq 0.62$      | HR $\geq 1.50$<br>HR $\leq 0.67$ |
| Ovarian       | 3,395  | 0.552*     | 30.1 (62)                | HR $\geq 1.46$<br>HR $\leq 0.68$      | HR $\geq 1.37$<br>HR $\leq 0.73$ |
| Prostate      | 24,023 | 0.146      | 62.4 (59)                | HR $\geq 1.32$<br>HR $\leq 0.76$      | HR $\geq 1.26$<br>HR $\leq 0.80$ |

\*All-cause mortality event rate.

Hazard ratios (HR) per standard deviation decrease estimated to be detected at 80% power calculated with the *survSNP* R package (63) (<https://cran.r-project.org/web/packages/survSNP/index.html>) using the combined estimated sample size and event rate from each cancer survival GWAS and the respective Genomics England cancer survival GWAS, median survival, and assuming a false positive rate of 0.05.

### Positive controls

Positive control analyses investigate the association between the exposure of interest and an outcome which has already been observed to have a causal association with this exposure (64). This enables the reliability of the genetic instruments for such exposures to be validated

(65). For these analyses, the positive control outcomes will be survival for cancers at sites which PD-1 or PD-L1 inhibitors have been approved for treatment by the MHRA (i.e., breast, head and neck, colorectal, lung, and melanoma cancer survival) (Table 1). However, these analyses will be crude positive controls as these drugs are approved to treat highly specific patient populations (Supplementary Table 1), whereas the cancer survival data have been generated from broader patient populations.

#### Instrument validation

Our main analyses assume that SNPs associated with circulating PD-1/L1 protein expression level in the general population will have similar effects on protein levels in cancer cases and biologically relevant tissues (defined as those tissues responsible for the therapeutic benefit of PD-1/L1 inhibition). However, as PD-1 expression is upregulated due to T cell activation and PD-L1 expression is induced by inflammation and carcinogenesis, SNP-protein effects may differ between the general population and cancer cases (66, 67). Thus, we will compare the strength and direction of SNP-protein associations amongst cancer cases, participants without a cancer diagnosis and in samples broadly representative of the general population in UK Biobank (68). We will perform these analyses for UK Biobank cancer cases pooled across the seven cancer sites which our analyses focus on (N = 3,375), each of the seven cancer sites individually (Table 4), and pooled across all cancer sites (68).

**Table 4.** Number of UK Biobank cancer cases and corresponding International Classification of Diseases tenth revision (ICD-10) code for each cancer site and with protein expression data available

| Cancer site        | ICD-10 code  | N     |
|--------------------|--------------|-------|
| Breast             | C50          | 780   |
| Colorectal         | C18-20       | 545   |
| Head and neck      | C00-C14, C32 | 124   |
| Lung               | C34          | 391   |
| Malignant melanoma | C43          | 292   |
| Ovary              | C56          | 89    |
| Prostate           | C61          | 1,154 |

Number of participants with each ICD-10 code obtained from Papier et al. (2023) (68).

The genetic instruments proxying circulating PD-1/L1 protein concentration will be further validated by investigating the strength and direction of the SNP-protein associations in UK Biobank cancer cases who were diagnosed with cancer prior to blood collection (prevalent cases) and those diagnosed with cancer following blood collection (incident cases). We will also assess whether the associations between these genetic instruments and circulating PD-1/L1 level differ by patient time-since-diagnosis. These sensitivity analyses will enable assessment as to whether the associations between these genetic instruments and circulating PD-1/L1 level (and so their strength as genetic instruments) differs for cancer patients over time.

Additionally, as PD-L1 is expressed by cells at a number of potentially biologically relevant tissues aside from blood, such as the tumour site, endothelial cells, and sites of metastases (66), we will also investigate the association between the constructed genetic instruments and expression of the gene encoding PD-L1, *CD274*, in these tissues.

For each cancer site of interest, we will explore the strength and direction of association between these genetic instruments and *CD274* expression in tumour samples obtained from

The Cancer Genome Atlas Program (TCGA) dataset (<https://www.cancer.gov/tcga>) (Table 5) to validate the instruments' strength in the biologically relevant target population and target tissue.

**Table 5.** Estimated number of tissue samples with germline genotype and gene expression data (N) available from The Cancer Genome Atlas Program (TCGA) dataset (<https://www.cancer.gov/tcga>) for each cancer site

| Cancer site   | Study name                            | Study abbreviation | N   |
|---------------|---------------------------------------|--------------------|-----|
| Breast        | Breast invasive carcinoma             | BRCA               | 770 |
| Colorectal    | Colon adenocarcinoma                  | COAD               | 298 |
|               | Rectum adenocarcinoma                 | READ               | 109 |
|               | Total                                 | -                  | 407 |
| Head and neck | Head and Neck squamous cell carcinoma | HNSC               | 366 |
| Lung          | Lung adenocarcinoma                   | LUAD               | 385 |
|               | Lung squamous cell carcinoma          | LUSC               | 334 |
|               | Total                                 | -                  | 719 |
| Melanoma      | Skin Cutaneous Melanoma               | SKCM               | 54  |
| Ovarian       | Ovarian serous cystadenocarcinoma     | OV                 | 211 |
| Prostate      | Prostate adenocarcinoma               | PRAD               | 366 |

We will also investigate the strength and direction of these associations for each anatomical site using tissue sample data obtained from the Genotype-Tissue Expression (GTEx) database (<https://www.gtexportal.org/home/>) (Table 6) and for immune cell populations obtained from Database of Immune Cell Expression, Expression quantitative trait loci (eQTLs) and Epigenomics (DICE) (<https://dice-database.org/>). This will enable validation of the strength and direction of association of these instruments in the tissues of interest and further understanding of the background level of expression of this gene not specific to cancer biology.

**Table 6.** Estimated sample sizes (N) available for measurements of gene expression in tissues at each anatomical site of interest obtained from the Genotype-Tissue Expression (GTEx) version 8 dataset (<https://www.gtexportal.org/home/tissue/>)

| Tissue site   | GTEx tissue name                    | N   |
|---------------|-------------------------------------|-----|
| Breast        | Breast – mammary tissue             | 396 |
| Colorectal    | Colon – sigmoid                     | 318 |
|               | Colon – transverse                  | 368 |
|               | Total                               | 686 |
| Head and neck | Minor salivary gland                | 144 |
| Lung          | Lung                                | 515 |
| Melanoma      | Skin – not sun exposed (suprapubic) | 517 |
|               | Sun – sun exposed (lower leg)       | 605 |
| Ovarian       | Ovary                               | 167 |
| Prostate      | Prostate                            | 221 |

1  
2  
3 1 Furthermore, as T cell level and function are affected by interactions between PD-1 and PD-  
4 2 L1, we will investigate the strength and direction of association of these genetic instruments  
5 3 with white blood cell count and function in general population samples as well as UK  
6 4 Biobank cancer cases and cancer-free participants (10, 12, 66, 69). This will serve as a  
7 5 positive control analysis, as we would expect that the genetic instruments proxying  
8 6 circulating PD-1/L1 levels will be associated with white blood cell metrics. Additionally, if  
9 7 the genetic instruments are associated with white blood cell metrics and cancer survival, this  
10 8 will provide evidence supporting a mechanism through which circulating PD-1/L1 level  
11 9 affects cancer survival mediated by white blood cells.

12 10  
13 11 Overall, these validation analyses will enable assessment as to whether it is appropriate to  
14 12 assume that SNPs associated with circulating PD-1/L1 levels can also be used to proxy PD-  
15 13 L1 expression at multiple anatomical sites in cancer cases and in biologically relevant tissues.

### 16 14 Sensitivity analyses

17 15 The main analyses will be repeated using genetic instruments constructed with more stringent  
18 16 thresholds: significance P-value thresholds of  $< 5 \times 10^{-7}$  and  $< 5 \times 10^{-8}$ , window sizes of 250  
19 17 kb and 100 kb on either side of the gene of interest, and LD  $r^2$  thresholds of 0.2, 0.1, and  
20 18 0.001. Although the primary analysis will only consider *cis* variants, *cis* and *trans* variants  
21 19 ( $>500$  kb from the gene of interest) will also be considered in secondary analyses.

22 20 Instruments constructed from *cis* and *trans* variants will be selected based on P-value and LD  
23 21 threshold ( $P < 5 \times 10^{-8}$ ,  $r^2 < 0.001$ ) with reference to a random sample of 10,000 participants  
24 22 from the UK Biobank. Where instruments are constructed from two or more SNPs, the  
25 23 primary analysis will also be re-run iteratively excluding individual SNPs from instruments to  
26 24 investigate whether findings are driven by individual SNPs (42).

27 25  
28 26 Colocalisation analysis will be performed using Pair-Wise Conditional analysis and  
29 27 Colocalisation analysis (PWCoCo) (<https://github.com/jwr-git/pwcoco>) to investigate  
30 28 whether any significant MR results are biased due to LD between one variant causing a  
31 29 change in protein expression and another causing a change in cancer survival through an  
32 30 independent pathway (4, 56, 70, 71).

33 31  
34 32 Pleiotropy will be investigated by conducting phenome-wide association studies (PheWAS)  
35 33 to investigate whether the genetic instruments proxying PD-1 or PD-L1 expression are also  
36 34 associated with other phenotypes. This will be achieved using the IEU Open GWAS project  
37 35 (<https://gwas.mrcieu.ac.uk/>) (50, 51). The significance thresholds will be Bonferroni-  
38 36 corrected for the number of traits looked up (37, 56). Although these methods will not  
39 37 specifically investigate horizontal pleiotropy, they will assess the possible extent of either  
40 38 vertical pleiotropy or horizontal pleiotropy. Vertical pleiotropy occurs when there is a  
41 39 mediator in the pathway between the exposure and outcome and, in contrast to horizontal  
42 40 pleiotropy, does not violate MR assumptions (38, 42, 52, 70).

43 41  
44 42 Index event bias (also known as collider bias) may occur in studies of cancer survival if the  
45 43 hypothesised causal factor being evaluated for disease prognosis (in this case, PD-1 or PD-  
46 44 L1) is also a risk factor for disease onset (4, 37, 72). If SNPs found to be significantly  
47 45 associated with cancer survival are also associated with risk of the same cancer type, methods  
48 46 including the SlopeHunter R package (<https://github.com/Osmahmoud/SlopeHunter>) will be  
49 47 used to evaluate and account for index event bias (73, 74).

## Secondary analyses

Where feasible, sub-group analyses will be performed to explore the impact of treatment history and tumour stage on the findings. We expect hazard ratios to be larger in earlier tumour stages and in treatment-naïve patients, compared to late-stage diagnoses and heavily treated patients, respectively.

## Software

The TwoSampleMR R package (<https://mrcieu.github.io/TwoSampleMR/>) (50, 51) will be used to perform two-sample MR using summary-level data.

## Study status

Following submission of this protocol for publication, we have started to implement the analysis plan using breast, lung, melanoma and ovarian cancer survival as the outcomes of interest. We anticipate completing these analyses in 2024 and submitting a paper detailing the findings of these analyses for publication by the end of 2024.

## Patient and public involvement

Members of an existing group of cancer patients and caregivers volunteered to discuss this research project after a proposal had been drafted. The importance of potential side effects of medications and generalisability of findings to populations of non-European ancestry were highlighted. The concerns related to side effects will not be addressed here as they are outside of the scope of this analysis but will be considered as limitations and could be studied in the future using alternate data sources such as electronic medical record data. The analyses may be able to be performed for non-European populations if genetic survival data from cancer patients of non-European ancestry are available. Patients and the public were not involved in the design of this study.

## ETHICS AND DISSEMINATION

No separate ethics approval will be required for these analyses as we will be using data from previously published genome-wide association studies which individually gained ethical approval and participant consent.

The protein expression GWAS conducted by Sun et al. (2022) utilised UK Biobank data obtained under the approved application numbers 65851, 20361, 26041, 44257, 53639, 69804 (43).

The breast cancer survival GWAS conducted by Morra et al. (2021) followed the Declaration of Helsinki principles (44). The colorectal cancer survival GWAS conducted by Labadie et al. (2022) gained approval by the Fred Hutchinson Cancer Research Center Institutional Review Board (45). The head and neck cancer and lung cancer survival GWAS ethical approval information are unpublished. The melanoma survival GWAS conducted by Seviiri et al. (2022) gained approval by the Sydney Local Health District Ethics Review Committee (MIA cohort), the United Kingdom's National North West Multi-Centre Research Ethics Committee (UK Biobank cohort) and the Human Research Ethics Committee of QIMR Berghofer Medical Research Institute (protocol) (46). The ovarian cancer survival GWAS conducted by Johnatty et al. (2015) and the prostate cancer survival GWAS conducted by



1 Szulkin et al. (2015) included primary GWAS which individually gained ethical approval  
2 from human research ethics committees (47, 48).(44). The colorectal cancer survival GWAS  
3 conducted by Labadie et al. (2022) gained approval by the Fred Hutchinson Cancer Research  
4 Center Institutional Review Board (45). The melanoma survival GWAS conducted by Seviiri  
5 et al. (2022) gained approval by the Sydney Local Health District Ethics Review Committee  
6 (MIA cohort), the United Kingdom's National North West Multi-Centre Research Ethics  
7 Committee (UK Biobank cohort) and the Human Research Ethics Committee of QIMR  
8 Berghofer Medical Research Institute (protocol) (46). The ovarian cancer survival GWAS  
9 conducted by Johnatty et al. (2015) and the prostate cancer survival GWAS conducted by  
10 Szulkin et al. (2015) included primary GWAS which individually gained ethical approval  
11 from human research ethics committees (47, 48).

12  
13 All participants involved in the protein expression GWAS and breast, colorectal, melanoma,  
14 ovarian (OCAC), and prostate cancer survival GWAS provided informed consent (43-48, 75).

15  
16 The results of these analyses will be published and disseminated to members of the  
17 University of Bristol MRC Integrative Epidemiology Unit ICEP User Reference Group,  
18 which is comprised of cancer patients and caregivers. The results will also be submitted to an  
19 open access peer-reviewed journal for publication and any statistical code will be made  
20 publicly available.  
21

## 22 **CONTRIBUTORS**

23 JY and PCH: Conceptualization, Methodology, Writing - Review & Editing, Supervision;  
24 RMM: Writing - Review & Editing, Supervision; TB: Writing - Original Draft.

## 25 **FUNDING**

26 TB is supported by grant MR/W006308/1 for the GW4 BIOMED MRC DTP, awarded to the  
27 Universities of Bath, Bristol, Cardiff and Exeter from the Medical Research Council  
28 (MRC)/UKRI. RMM is a National Institute for Health Research Senior Investigator  
29 (NIHR202411). RMM, JY, and PCH are supported by a Cancer Research UK 25  
30 (C18281/A29019) programme grant (the Integrative Cancer Epidemiology Programme).  
31 RMM is also supported by the NIHR Bristol Biomedical Research Centre which is funded by  
32 the NIHR (BRC-1215-20011) and is a partnership between University Hospitals Bristol and  
33 Weston NHS Foundation Trust and the University of Bristol. RMM is affiliated with the  
34 Medical Research Council Integrative Epidemiology Unit at the University of Bristol which  
35 is supported by the Medical Research Council (MC\_UU\_00011/1, MC\_UU\_00011/3,  
36 MC\_UU\_00011/6, and MC\_UU\_00011/4) and the University of Bristol. Department of  
37 Health and Social Care disclaimer: The views expressed are those of the author(s) and not  
38 necessarily those of the NHS, the NIHR or the Department of Health and Social Care. JY is  
39 also supported by the NIHR Imperial Biomedical Research Centre (BRC).  
40

## 41 **COMPETING INTERESTS**

42 RMM, JY and PCH have received funding from Cancer Research UK. TB receives funding  
43 from the GW4 BIOMED MRC DTP.

1  
2  
3  
4  
5  
6  
7  
8  
9  
10  
11  
12  
13  
14  
15  
16  
17  
18  
19  
20  
21  
22  
23  
24  
25  
26  
27  
28  
29  
30  
31  
32  
33  
34  
35  
36  
37  
38  
39  
40  
41  
42  
43  
44  
45  
46  
47  
48  
49  
50  
51  
52  
53  
54  
55  
56  
57  
58  
59  
60  
**1 REFERENCES**

1. Walker VM, Davey Smith G, Davies NM, Martin RM. Mendelian randomization: a novel approach for the prediction of adverse drug events and drug repurposing opportunities. *Int J Epidemiol*. 2017;46(6):2078-89.
2. Tran AA, Prasad V. Drug repurposing for cancer treatments: a well-intentioned, but misguided strategy. *The Lancet Oncology*. 2020;21(9):1134-6.
3. Zhang Z, Zhou L, Xie N, Nice EC, Zhang T, Cui Y, et al. Overcoming cancer therapeutic bottleneck by drug repurposing. *Signal Transduct Target Ther*. 2020;5(1):113.
4. Joharatnam-Hogan N, Alexandre L, Yarmolinsky J, Lake B, Capps N, Martin RM, et al. Statins as Potential Chemoprevention or Therapeutic Agents in Cancer: a Model for Evaluating Repurposed Drugs. *Curr Oncol Rep*. 2021;23(3):29.
5. Walker VM, Kehoe PG, Martin RM, Davies NM. Repurposing antihypertensive drugs for the prevention of Alzheimer's disease: a Mendelian randomization study. *International Journal of Epidemiology*. 2019;49(4):1132-40.
6. Liu J, Cheng Y, Li M, Zhang Z, Li T, Luo X-J. Genome-wide Mendelian randomization identifies actionable novel drug targets for psychiatric disorders. *Neuropsychopharmacology*. 2023;48(2):270-80.
7. Sung H, Ferlay J, Siegel RL, Laversanne M, Soerjomataram I, Jemal A, et al. Global Cancer Statistics 2020: GLOBOCAN Estimates of Incidence and Mortality Worldwide for 36 Cancers in 185 Countries. *CA: A Cancer Journal for Clinicians*. 2021;71(3):209-49.
8. Hanusova V, Skalova L, Kralova V, Matouskova P. Potential anti-cancer drugs commonly used for other indications. *Curr Cancer Drug Targets*. 2015;15(1):35-52.
9. Yang EJ, Wu C, Liu Y, Lv J, Sup Shim J. Revisiting Non-Cancer Drugs for Cancer Therapy. *Curr Top Med Chem*. 2016;16(19):2144-55.
10. Marin-Acevedo JA, Kimbrough EO, Lou Y. Next generation of immune checkpoint inhibitors and beyond. *Journal of Hematology & Oncology*. 2021;14(1):45.
11. Hanahan D. Hallmarks of Cancer: New Dimensions. *Cancer Discovery*. 2022;12(1):31-46.
12. Fessas P, Lee H, Ikemizu S, Janowitz T. A molecular and preclinical comparison of the PD-1-targeted T-cell checkpoint inhibitors nivolumab and pembrolizumab. *Semin Oncol*. 2017;44(2):136-40.
13. Medicines and Healthcare products Regulatory Agency. LIBTAYO: SUMMARY OF PRODUCT CHARACTERISTICS 2022 [Available from: <https://mhraproducts4853.blob.core.windows.net/docs/1f0f40fa2f9461bd438b181736a620032651f70a>].
14. Medicines and Healthcare products Regulatory Agency. JEMPERLI: SUMMARY OF PRODUCT CHARACTERISTICS 2022 [Available from: <https://mhraproducts4853.blob.core.windows.net/docs/17d1049c69f319d0b5d3b392264f1473da412992>].
15. Medicines and Healthcare products Regulatory Agency. OPDIVO: SUMMARY OF PRODUCT CHARACTERISTICS 2022 [Available from: <https://mhraproducts4853.blob.core.windows.net/docs/8355d7f28eb4601b4f0cfd41f6b423cc0ecbb7ac>].
16. Medicines and Healthcare products Regulatory Agency. KEYTRUDA: SUMMARY OF PRODUCT CHARACTERISTICS 2022 [Available from: <https://mhraproducts4853.blob.core.windows.net/docs/9a01eb070d0f4b699fc009e2a0932ae62586477f>].
17. Medicines and Healthcare products Regulatory Agency. Tecentriq: SUMMARY OF PRODUCT CHARACTERISTICS 2022 [Available from:

- <https://mhraproducts4853.blob.core.windows.net/docs/9ee66a803927d06cf73407425f3c46aa9172e3d9>.
18. Medicines and Healthcare products Regulatory Agency. Bavencio: SUMMARY OF PRODUCT CHARACTERISTICS 2023 [Available from: <https://mhraproducts4853.blob.core.windows.net/docs/67a96f2b38c91da858ddea961907c4c8315b36ec>].
19. Medicines and Healthcare products Regulatory Agency. IMFINZI: SUMMARY OF PRODUCT CHARACTERISTICS 2023 [Available from: <https://mhraproducts4853.blob.core.windows.net/docs/c631685fa069c1e6b3c414043180b30082374d65>].
20. Singh V, Sheikh A, Abourehab MAS, Kesharwani P. Dostarlimab as a Miracle Drug: Rising Hope against Cancer Treatment. *Biosensors (Basel)*. 2022;12(8).
21. Wesolowski J, Tankiewicz-Kwedlo A, Pawlak D. Modern Immunotherapy in the Treatment of Triple-Negative Breast Cancer. *Cancers (Basel)*. 2022;14(16).
22. Wong CC, Cheng KW, Rigas B. Preclinical predictors of anticancer drug efficacy: critical assessment with emphasis on whether nanomolar potency should be required of candidate agents. *J Pharmacol Exp Ther*. 2012;341(3):572-8.
23. Morand S, Devanaboyina M, Staats H, Stanbery L, Nemunaitis J. Ovarian Cancer Immunotherapy and Personalized Medicine. *Int J Mol Sci*. 2021;22(12).
24. Shoji T, Sato C, Tomabechi H, Takatori E, Kaido Y, Nagasawa T, et al. Expectations and Challenges of First-Line Maintenance Therapy for Advanced Ovarian Cancer. *Medicina (Kaunas)*. 2021;57(5).
25. Ledermann JA, Colombo N, Oza AM, Fujiwara K, Birrer MJ, Randall LM, et al. Avelumab in combination with and/or following chemotherapy vs chemotherapy alone in patients with previously untreated epithelial ovarian cancer: Results from the phase 3 javelin ovarian 100 trial. *Gynecologic Oncology*. 2020;159:13-4.
26. Moore KN, Bookman M, Sehouli J, Miller A, Anderson C, Scambia G, et al. Atezolizumab, Bevacizumab, and Chemotherapy for Newly Diagnosed Stage III or IV Ovarian Cancer: Placebo-Controlled Randomized Phase III Trial (IMagyn050/GOG 3015/ENGOT-OV39). *Journal of Clinical Oncology*. 2021;39(17):1842-55.
27. Harter P, Bidziński M, Colombo N, Floquet A, Pérez MJR, Kim J-W, et al. DUO-O: A randomized phase III trial of durvalumab (durva) in combination with chemotherapy and bevacizumab (bev), followed by maintenance durva, bev and olaparib (olap), in newly diagnosed advanced ovarian cancer patients. *Journal of Clinical Oncology*. 2019;37(15\_suppl):TP5598-TPS.
28. Jeong T-J, Lee H-T, Gu N, Jang Y-J, Choi S-B, Park U-B, et al. The High-Resolution Structure Reveals Remarkable Similarity in PD-1 Binding of Cemiplimab and Dostarlimab, the FDA-Approved Antibodies for Cancer Immunotherapy. *Biomedicines*. 2022;10(12):3154.
29. Hudson K, Cross N, Jordan-Mahy N, Leyland R. The Extrinsic and Intrinsic Roles of PD-L1 and Its Receptor PD-1: Implications for Immunotherapy Treatment. *Frontiers in Immunology*. 2020;11.
30. Qin W, Hu L, Zhang X, Jiang S, Li J, Zhang Z, et al. The Diverse Function of PD-1/PD-L Pathway Beyond Cancer. *Frontiers in Immunology*. 2019;10.
31. Khan M, Zhao Z, Arooj S, Fu Y, Liao G. Soluble PD-1: Predictive, Prognostic, and Therapeutic Value for Cancer Immunotherapy. *Frontiers in Immunology*. 2020;11.
32. Wang X, Yang X, Zhang C, Wang Y, Cheng T, Duan L, et al. Tumor cell-intrinsic PD-1 receptor is a tumor suppressor and mediates resistance to PD-1 blockade therapy. *Proceedings of the National Academy of Sciences*. 2020;117(12):6640-50.
33. Fanale D, Brando C, Corsini LR, Cutaia S, Di Donna MC, Randazzo U, et al. Low plasma PD-L1 levels, early tumor onset and absence of peritoneal carcinomatosis improve

- 1 prognosis of women with advanced high-grade serous ovarian cancer. *BMC Cancer*.  
2 2023;23(1):437.
- 3 34. Scirocchi F, Strigari L, Di Filippo A, Napoletano C, Pace A, Rahimi H, et al. Soluble  
4 PD-L1 as a Prognostic Factor for Immunotherapy Treatment in Solid Tumors: Systematic  
5 Review and Meta-Analysis. *Int J Mol Sci*. 2022;23(22).
- 6 35. Park SJ, Park JY, Shin K, Hong TH, Lee M, Kim Y, et al. Clinical significance of  
7 serum-derived exosomal PD-L1 expression in patients with advanced pancreatic cancer.  
8 *BMC Cancer*. 2023;23(1):389.
- 9 36. Zheng J, Baird D, Borges MC, Bowden J, Hemani G, Haycock P, et al. Recent  
10 Developments in Mendelian Randomization Studies. *Curr Epidemiol Rep*. 2017;4(4):330-45.
- 11 37. Mokry LE, Zhou S, Guo C, Scott RA, Devey L, Langenberg C, et al. Interleukin-18 as  
12 a drug repositioning opportunity for inflammatory bowel disease: A Mendelian  
13 randomization study. *Scientific Reports*. 2019;9(1):9386.
- 14 38. Gill D, Georgakis MK, Walker VM, Schmidt AF, Gkatzionis A, Freitag DF, et al.  
15 Mendelian randomization for studying the effects of perturbing drug targets. *Wellcome Open*  
16 *Res*. 2021;6:16.
- 17 39. Khasawneh LQ, Al-Mahayri ZN, Ali BR. Mendelian randomization in  
18 pharmacogenomics: The unforeseen potentials. *Biomedicine & Pharmacotherapy*.  
19 2022;150:112952.
- 20 40. Tang B, Wang Y, Jiang X, Thambisetty M, Ferrucci L, Johnell K, et al. Genetic  
21 Variation in Targets of Antidiabetic Drugs and Alzheimer Disease Risk. A Mendelian  
22 Randomization Study. 2022;99(7):e650-e9.
- 23 41. Acosta JN, Szejko N, Falcone GJ. Mendelian Randomization in Stroke: A Powerful  
24 Approach to Causal Inference and Drug Target Validation. *Frontiers in Genetics*. 2021;12.
- 25 42. Yarmolinsky J, Díez-Obrero V, Richardson TG, Pigeyre M, Sjaarda J, Paré G, et al.  
26 Genetically proxied therapeutic inhibition of antihypertensive drug targets and risk of  
27 common cancers: A mendelian randomization analysis. *PLOS Medicine*.  
28 2022;19(2):e1003897.
- 29 43. Sun BB, Chiou J, Traylor M, Benner C, Hsu Y-H, Richardson TG, et al. Genetic  
30 regulation of the human plasma proteome in 54,306 UK Biobank participants. *bioRxiv*.  
31 2022:2022.06.17.496443.
- 32 44. Morra A, Escala-Garcia M, Beesley J, Keeman R, Canisius S, Ahearn TU, et al.  
33 Association of germline genetic variants with breast cancer-specific survival in patient  
34 subgroups defined by clinic-pathological variables related to tumor biology and type of  
35 systemic treatment. *Breast Cancer Research*. 2021;23(1):86.
- 36 45. Labadie JD, Savas S, Harrison TA, Banbury B, Huang Y, Buchanan DD, et al.  
37 Genome-wide association study identifies tumor anatomical site-specific risk variants for  
38 colorectal cancer survival. *Scientific Reports*. 2022;12(1):127.
- 39 46. Seviiri M, Scolyer RA, Bishop DT, Newton-Bishop JA, Iles MM, Lo SN, et al.  
40 Higher polygenic risk for melanoma is associated with improved survival in a high ultraviolet  
41 radiation setting. *Journal of Translational Medicine*. 2022;20(1):403.
- 42 47. Johnatty SE, Tyrer JP, Kar S, Beesley J, Lu Y, Gao B, et al. Genome-wide Analysis  
43 Identifies Novel Loci Associated with Ovarian Cancer Outcomes: Findings from the Ovarian  
44 Cancer Association Consortium. *Clin Cancer Res*. 2015;21(23):5264-76.
- 45 48. Szulkin R, Karlsson R, Whittington T, Aly M, Gronberg H, Eeles RA, et al. Genome-  
46 wide association study of prostate cancer-specific survival. *Cancer Epidemiol Biomarkers*  
47 *Prev*. 2015;24(11):1796-800.
- 48 49. Nagle CM, Dixon SC, Jensen A, Kjaer SK, Modugno F, deFazio A, et al. Obesity and  
49 survival among women with ovarian cancer: results from the Ovarian Cancer Association  
50 Consortium. *Br J Cancer*. 2015;113(5):817-26.

- 1 50. Hemani G, Zheng J, Elsworth B, Wade KH, Haberland V, Baird D, et al. The MR-  
2 Base platform supports systematic causal inference across the human phenome. *Elife*. 2018;7.
- 3 51. Hemani G, Tilling K, Davey Smith G. Orienting the causal relationship between  
4 imprecisely measured traits using GWAS summary data. *PLOS Genetics*.  
5 2017;13(11):e1007081.
- 6 52. Schmidt AF, Finan C, Gordillo-Marañón M, Asselbergs FW, Freitag DF, Patel RS, et  
7 al. Genetic drug target validation using Mendelian randomisation. *Nature Communications*.  
8 2020;11(1):3255.
- 9 53. Chang CC, Chow CC, Tellier LC, Vattikuti S, Purcell SM, Lee JJ. Second-generation  
10 PLINK: rising to the challenge of larger and richer datasets. *GigaScience*. 2015;4(1).
- 11 54. Purcell S, Neale B, Todd-Brown K, Thomas L, Ferreira MA, Bender D, et al. PLINK:  
12 a tool set for whole-genome association and population-based linkage analyses. *Am J Hum*  
13 *Genet*. 2007;81(3):559-75.
- 14 55. Auton A, Brooks LD, Durbin RM, Garrison EP, Kang HM, Korbel JO, et al. A global  
15 reference for human genetic variation. *Nature*. 2015;526(7571):68-74.
- 16 56. Gaziano L, Giambartolomei C, Pereira AC, Gaulton A, Posner DC, Swanson SA, et  
17 al. Actionable druggable genome-wide Mendelian randomization identifies repurposing  
18 opportunities for COVID-19. *Nature Medicine*. 2021;27(4):668-76.
- 19 57. Burgess S, Zuber V, Valdes-Marquez E, Sun BB, Hopewell JC. Mendelian  
20 randomization with fine-mapped genetic data: Choosing from large numbers of correlated  
21 instrumental variables. *Genet Epidemiol*. 2017;41(8):714-25.
- 22 58. Porcu E, Rueger S, Lepik K, Agbessi M, Ahsan H, Alves I, et al. Mendelian  
23 randomization integrating GWAS and eQTL data reveals genetic determinants of complex  
24 and clinical traits. *Nature Communications*. 2019;10(1):3300.
- 25 59. Alessy SA, Davies EA, Rawlinson J, Baker M, Luchtenborg M. How representative  
26 are colorectal, lung, breast and prostate cancer patients responding to the National Cancer  
27 Patient Experience Survey (CPES) of the cancer registry population in England? A  
28 population-based case control study. *BMJ Open*. 2019;9(12):e034344.
- 29 60. Dittberner A, Friedl B, Wittig A, Buentzel J, Kaftan H, Boeger D, et al. Gender  
30 Disparities in Epidemiology, Treatment, and Outcome for Head and Neck Cancer in  
31 Germany: A Population-Based Long-Term Analysis from 1996 to 2016 of the Thuringian  
32 Cancer Registry. *Cancers*. 2020;12(11):3418.
- 33 61. Sandru A, Voinea S, Panaitescu E, Blidaru A. Survival rates of patients with  
34 metastatic malignant melanoma. *J Med Life*. 2014;7(4):572-6.
- 35 62. Cheeseman S, Levick B, Sopwith W, Fenton H, Nam EJ, Kim D, et al. Ovarian Real-  
36 World International Consortium (ORWIC): A multicentre, real-world analysis of epithelial  
37 ovarian cancer treatment and outcomes. *Frontiers in Oncology*. 2023;13.
- 38 63. Owzar K, Li Z, Cox N, Jung SH. Power and sample size calculations for SNP  
39 association studies with censored time-to-event outcomes. *Genet Epidemiol*. 2012;36(6):538-  
40 48.
- 41 64. Burgess S, Davey Smith G, Davies NM, Dudbridge F, Gill D, Glymour MM, et al.  
42 Guidelines for performing Mendelian randomization investigations. *Wellcome Open Res*.  
43 2019;4:186.
- 44 65. Taschler B, Smith SM, Nichols TE. Causal inference on neuroimaging data with  
45 Mendelian randomisation. *NeuroImage*. 2022;258:119385.
- 46 66. Sharpe AH, Pauken KE. The diverse functions of the PD1 inhibitory pathway. *Nature*  
47 *Reviews Immunology*. 2018;18(3):153-67.
- 48 67. Kula A, Dawidowicz M, Kiczmer P, Prawdzic Seńkowska A, Świętochowska E. The  
49 role of genetic polymorphism within PD-L1 gene in cancer. Review. *Experimental and*  
50 *Molecular Pathology*. 2020;116:104494.

- 1  
2  
3 1 68. Papier K, Atkins JR, Tong TY, Gaitskell K, Desai T, Ogamba CF, et al. Identifying  
4 2 proteomic risk factors for cancer using prospective and exome analyses: 1,463 circulating  
5 3 proteins and risk of 19 cancers in the UK Biobank. medRxiv. 2023:2023.07.28.23293330.  
6 4 69. Akbari P, Vuckovic D, Stefanucci L, Jiang T, Kundu K, Kreuzhuber R, et al. A  
7 5 genome-wide association study of blood cell morphology identifies cellular proteins  
8 6 implicated in disease aetiology. Nature Communications. 2023;14(1):5023.  
9 7 70. Zheng J, Haberland V, Baird D, Walker V, Haycock PC, Hurlle MR, et al. Phenome-  
10 8 wide Mendelian randomization mapping the influence of the plasma proteome on complex  
11 9 diseases. Nature Genetics. 2020;52(10):1122-31.  
12 10 71. Robinson JW, Hemani G, Babaei MS, Huang Y, Baird DA, Tsai EA, et al. An  
13 11 efficient and robust tool for colocalisation: Pair-wise Conditional and Colocalisation  
14 12 (PWCoCo). bioRxiv. 2022:2022.08.08.503158.  
15 13 72. Mitchell RE, Hartley A, Walker VM, Gkatzionis A, Yarmolinsky J, Bell JA, et al.  
16 14 Strategies to investigate and mitigate collider bias in genetic and Mendelian randomization  
17 15 studies of disease progression. medRxiv. 2022:2022.04.22.22274166.  
18 16 73. Mahmoud O, Dudbridge F, Davey Smith G, Munafo M, Tilling K. A robust method  
19 17 for collider bias correction in conditional genome-wide association studies. Nature  
20 18 Communications. 2022;13(1):619.  
21 19 74. Cai S, Hartley A, Mahmoud O, Tilling K, Dudbridge F. Adjusting for collider bias in  
22 20 genetic association studies using instrumental variable methods. Genet Epidemiol.  
23 21 2022;46(5-6):303-16.  
24 22 75. Schumacher FR, Berndt SI, Siddiq A, Jacobs KB, Wang Z, Lindstrom S, et al.  
25 23 Genome-wide association study identifies new prostate cancer susceptibility loci. Hum Mol  
26 24 Genet. 2011;20(19):3867-75.

1  
2  
3  
4  
5  
6  
7  
8  
9  
10  
11  
12  
13  
14  
15  
16  
17  
18  
19  
20  
21  
22  
23  
24  
25  
26  
27  
28  
29  
30  
31  
32  
33  
34  
35  
36  
37  
38  
39  
40  
41  
42  
43  
44  
45  
46

For peer review only

## SUPPLEMENTARY MATERIAL

Supplementary table 1: Medicines and Healthcare products Regulatory Agency indications of anti-programmed cell death protein 1 (PD-1) and anti-programmed cell death ligand 1 (PD-L1) monoclonal antibodies obtained 25<sup>th</sup> March 2023 (\* represents monotherapy indications and \*\* represents indications as part of combination therapy).

Molecular markers: epidermal growth factor receptor gene (*EGFR*), anaplastic lymphoma kinase gene (*ALK*), c-ros oncogene 1 gene (*ROS1*), deficient mismatch repair (dMMR), microsatellite instability high (MSI-H), combined positive score (CPS), tumour proportion score (TPS).

Cancers: non-small cell lung cancer (NSCLC), head and neck squamous cell carcinoma (HNSCC), triple-negative breast cancer (TNBC), small cell lung cancer (SCLC).

| Target | Drug             | Cancer |                                                         |                                                            |                                                                                                                                                      |                                                                                                                                |         |          |
|--------|------------------|--------|---------------------------------------------------------|------------------------------------------------------------|------------------------------------------------------------------------------------------------------------------------------------------------------|--------------------------------------------------------------------------------------------------------------------------------|---------|----------|
|        |                  | Breast | Colorectal                                              | Head and neck                                              | Lung                                                                                                                                                 | Melanoma                                                                                                                       | Ovarian | Prostate |
| PD-1   | Cemiplimab (13)  | -      | -                                                       | -                                                          | • Metastatic or locally advanced PD-L1 ≥ 50% TPS<br>NSCLC ( <i>EGFR</i> , <i>ALK</i> , <i>ROS1</i> wildtype)*                                        | -                                                                                                                              | -       | -        |
|        | Dostarlimab (14) | -      | -                                                       | -                                                          | -                                                                                                                                                    | -                                                                                                                              | -       | -        |
|        | Nivolumab (15)   | -      | • dMMR/MSI-H colorectal cancer following chemotherapy** | • Metastatic or recurrent HNSCC following prior treatment* | • Metastatic NSCLC ( <i>EGFR</i> , <i>ALK</i> wild type)**<br>• Metastatic or locally advanced NSCLC following chemotherapy*<br>• Resectable NSCLC** | • Metastatic or unresectable melanoma*.<br>• Metastatic or lymph node involved melanoma patients following complete resection* | -       | -        |



|       |                    |                                                                                                                                                                                                                        |                                                                                                                                                                                                            |                                                                                                                                                                                                                                                         |                                                                                                                                                                                                                                                                                                                                                                                                                                                                                    |                                                                                                                                                       |   |   |
|-------|--------------------|------------------------------------------------------------------------------------------------------------------------------------------------------------------------------------------------------------------------|------------------------------------------------------------------------------------------------------------------------------------------------------------------------------------------------------------|---------------------------------------------------------------------------------------------------------------------------------------------------------------------------------------------------------------------------------------------------------|------------------------------------------------------------------------------------------------------------------------------------------------------------------------------------------------------------------------------------------------------------------------------------------------------------------------------------------------------------------------------------------------------------------------------------------------------------------------------------|-------------------------------------------------------------------------------------------------------------------------------------------------------|---|---|
|       | Pembrolizumab (16) | <ul style="list-style-type: none"> <li>• Locally advanced or early-stage TNBC with high risk of recurrence***</li> <li>• Metastatic or locally recurrent unresectable PD-L1 CPS <math>\geq 10</math> TNBC**</li> </ul> | <ul style="list-style-type: none"> <li>• Treatment-naïve metastatic dMMR/MSI-H colorectal cancer*</li> <li>• Metastatic or unresectable dMMR/MSI-H colorectal cancer following prior treatment*</li> </ul> | <ul style="list-style-type: none"> <li>• Treatment-naïve metastatic or unresectable recurrent PD-L1 CPS <math>\geq 1</math> HNSCC***</li> <li>• Metastatic or recurrent PD-L1 TPS <math>\geq 50\%</math> HNSCC following prior chemotherapy*</li> </ul> | <ul style="list-style-type: none"> <li>• Metastatic NSCLC with PD-L1 <math>\geq 50\%</math> TPS (<i>EGFR</i>, <i>ALK</i> wild-type)*.**</li> <li>• Metastatic or locally advanced PD-L1 <math>\geq 1\%</math> TPS NSCLC following chemotherapy and targeted therapy (if applicable)*</li> </ul>                                                                                                                                                                                    | <ul style="list-style-type: none"> <li>• Metastatic or unresectable melanoma*</li> <li>• Completely resected stage IIB, IIC, III melanoma*</li> </ul> |   |   |
| PD-L1 | Atezolizumab (17)  | <ul style="list-style-type: none"> <li>• Metastatic or locally advanced PD-L1 <math>\geq 1\%</math> TPS TNBC**</li> </ul>                                                                                              | -                                                                                                                                                                                                          | -                                                                                                                                                                                                                                                       | <ul style="list-style-type: none"> <li>• Completely resected stage II-III A NSCLC with PD-L1 <math>\geq 50\%</math> and no progression on prior chemotherapy*</li> <li>• Metastatic nonsquamous NSCLC**</li> <li>• Metastatic NSCLC PD-L1 <math>\geq 50\%</math> TPS (<i>EGFR</i>, <i>ALK</i> wildtype)*</li> <li>• Metastatic or locally advanced NSCLC following chemotherapy and targeted therapy (if applicable)*</li> <li>• Treatment-naïve extensive stage SCLC**</li> </ul> |                                                                                                                                                       |   |   |
|       | Avelumab (18)      | -                                                                                                                                                                                                                      | -                                                                                                                                                                                                          | -                                                                                                                                                                                                                                                       | -                                                                                                                                                                                                                                                                                                                                                                                                                                                                                  | -                                                                                                                                                     | - | - |

1  
2  
3  
4  
5  
6  
7  
8  
9  
10  
11  
12  
13  
14  
15  
16  
17  
18  
19  
20  
21  
22  
23  
24  
25  
26  
27  
28  
29  
30  
31  
32  
33  
34  
35  
36  
37  
38  
39  
40  
41  
42  
43  
44  
45  
46

|  |                 |  |  |  |                                                                                                                                                                                                                 |  |  |  |
|--|-----------------|--|--|--|-----------------------------------------------------------------------------------------------------------------------------------------------------------------------------------------------------------------|--|--|--|
|  | Durvalumab (19) |  |  |  | <ul style="list-style-type: none"> <li>• Locally advanced unresectable PD-L1 <math>\geq</math> 1% TPS NSCLC without progression on chemoradiation*</li> <li>• Treatment-naïve extensive-stage SCLC**</li> </ul> |  |  |  |
|--|-----------------|--|--|--|-----------------------------------------------------------------------------------------------------------------------------------------------------------------------------------------------------------------|--|--|--|

For peer review only
