# Supplementary material for: Investigating the association between genetically proxied circulating levels of immune checkpoint proteins and cancer survival: protocol for a Mendelian randomisation analysis
Source: PubMed Central journal article supplement (PMC10875531; doi:10.1136/bmjopen-2023-075981), 2024-02-15
Supplement: bmjopen-2023-075981supp001.pdf [file bmjopen-2023-075981supp001.pdf]

## SUPPLEMENTARY MATERIAL

Supplementary table 1: Medicines and Healthcare products Regulatory Agency indications of anti-programmed cell death protein 1 (PD-1) and anti-programmed cell death ligand 1 (PD-L1) monoclonal antibodies obtained 25<sup>th</sup> March 2023 (\* represents monotherapy indications and \*\* represents indications as part of combination therapy).

Molecular markers: epidermal growth factor receptor gene (*EGFR*), anaplastic lymphoma kinase gene (*ALK*), c-ros oncogene 1 gene (*ROS1*), deficient mismatch repair (dMMR), microsatellite instability high (MSI-H), combined positive score (CPS), tumour proportion score (TPS).

Cancers: non-small cell lung cancer (NSCLC), head and neck squamous cell carcinoma (HNSCC), triple-negative breast cancer (TNBC), small cell lung cancer (SCLC).

| Target | Drug             | Cancer |                                                         |                                                            |                                                                                                                                                      |                                                                                                                                  |         |          |
|--------|------------------|--------|---------------------------------------------------------|------------------------------------------------------------|------------------------------------------------------------------------------------------------------------------------------------------------------|----------------------------------------------------------------------------------------------------------------------------------|---------|----------|
|        |                  | Breast | Colorectal                                              | Head and neck                                              | Lung                                                                                                                                                 | Melanoma                                                                                                                         | Ovarian | Prostate |
| PD-1   | Cemiplimab (13)  | -      | -                                                       | -                                                          | • Metastatic or locally advanced PD-L1 ≥ 50% TPS NSCLC ( <i>EGFR</i> , <i>ALK</i> , <i>ROS1</i> wildtype)*                                           | -                                                                                                                                | -       | -        |
|        | Dostarlimab (14) | -      | -                                                       | -                                                          | -                                                                                                                                                    | -                                                                                                                                | -       |          |
|        | Nivolumab (15)   | -      | • dMMR/MSI-H colorectal cancer following chemotherapy** | • Metastatic or recurrent HNSCC following prior treatment* | • Metastatic NSCLC ( <i>EGFR</i> , <i>ALK</i> wild type)**<br>• Metastatic or locally advanced NSCLC following chemotherapy*<br>• Resectable NSCLC** | • Metastatic or unresectable melanoma*.**<br>• Metastatic or lymph node involved melanoma patients following complete resection* | -       | -        |

|       |                    |                                                                                                                                                                                                                        |                                                                                                                                                                                                            |                                                                                                                                                                                                                                                        |                                                                                                                                                                                                                                                                                                                                                                                                                                                                                  |                                                                                                                                                       |  |  |
|-------|--------------------|------------------------------------------------------------------------------------------------------------------------------------------------------------------------------------------------------------------------|------------------------------------------------------------------------------------------------------------------------------------------------------------------------------------------------------------|--------------------------------------------------------------------------------------------------------------------------------------------------------------------------------------------------------------------------------------------------------|----------------------------------------------------------------------------------------------------------------------------------------------------------------------------------------------------------------------------------------------------------------------------------------------------------------------------------------------------------------------------------------------------------------------------------------------------------------------------------|-------------------------------------------------------------------------------------------------------------------------------------------------------|--|--|
|       | Pembrolizumab (16) | <ul style="list-style-type: none"> <li>• Locally advanced or early-stage TNBC with high risk of recurrence***</li> <li>• Metastatic or locally recurrent unresectable PD-L1 CPS <math>\geq</math> 10 TNBC**</li> </ul> | <ul style="list-style-type: none"> <li>• Treatment-naïve metastatic dMMR/MSI-H colorectal cancer*</li> <li>• Metastatic or unresectable dMMR/MSI-H colorectal cancer following prior treatment*</li> </ul> | <ul style="list-style-type: none"> <li>• Treatment-naïve metastatic or unresectable recurrent PD-L1 CPS <math>\geq</math> 1 HNSCC***</li> <li>• Metastatic or recurrent PD-L1 TPS <math>\geq</math> 50% HNSCC following prior chemotherapy*</li> </ul> | <ul style="list-style-type: none"> <li>• Metastatic NSCLC with PD-L1 <math>\geq</math> 50% TPS (<i>EGFR</i>, <i>ALK</i> wild-type)***</li> <li>• Metastatic or locally advanced PD-L1 <math>\geq</math> 1% TPS NSCLC following chemotherapy and targeted therapy (if applicable)*</li> </ul>                                                                                                                                                                                     | <ul style="list-style-type: none"> <li>• Metastatic or unresectable melanoma*</li> <li>• Completely resected stage IIB, IIC, III melanoma*</li> </ul> |  |  |
| PD-L1 | Atezolizumab (17)  | <ul style="list-style-type: none"> <li>• Metastatic or locally advanced PD-L1 <math>\geq</math> 1% TPS TNBC**</li> </ul>                                                                                               |                                                                                                                                                                                                            |                                                                                                                                                                                                                                                        | <ul style="list-style-type: none"> <li>• Completely resected stage II-III A NSCLC with PD-L1 <math>\geq</math> 50% and no progression on prior chemotherapy*</li> <li>• Metastatic nonsquamous NSCLC**</li> <li>• Metastatic NSCLC PD-L1 <math>\geq</math> 50% TPS (<i>EGFR</i>, <i>ALK</i> wildtype)*</li> <li>• Metastatic or locally advanced NSCLC following chemotherapy and targeted therapy (if applicable)*</li> <li>• Treatment-naïve extensive stage SCLC**</li> </ul> |                                                                                                                                                       |  |  |
|       | Avelumab (18)      |                                                                                                                                                                                                                        |                                                                                                                                                                                                            |                                                                                                                                                                                                                                                        |                                                                                                                                                                                                                                                                                                                                                                                                                                                                                  |                                                                                                                                                       |  |  |

|  |                 |  |  |  |                                                                                                                                                                                                              |  |  |  |
|--|-----------------|--|--|--|--------------------------------------------------------------------------------------------------------------------------------------------------------------------------------------------------------------|--|--|--|
|  | Durvalumab (19) |  |  |  | <ul style="list-style-type: none"><li>• Locally advanced unresectable PD-L1 <math>\geq</math> 1% TPS NSCLC without progression on chemoradiation*</li><li>• Treatment-naïve extensive-stage SCLC**</li></ul> |  |  |  |
|--|-----------------|--|--|--|--------------------------------------------------------------------------------------------------------------------------------------------------------------------------------------------------------------|--|--|--|
